1 Uribe-Convers and Tank: Diversification Linked to Biogeographic Movement

2

3

4

5

6

7

8 **Shifts in diversification rates linked to biogeographic movement into new areas: an**

9 **example of a recent radiation in the Andes<sup>1</sup>**

10

11

12 Simon Uribe-Convers<sup>2</sup> and David C. Tank

13 *Department of Biological Sciences, University of Idaho, 875 Perimeter MS 3051*

14 *Moscow, ID, 83844–3051, USA*

15

16

17

18

19

20

21

22

23

24 <sup>1</sup>Manuscript received \_\_\_\_\_; revision accepted \_\_\_\_\_.

25 <sup>2</sup>Author for correspondence: Simon Uribe-Convers; email: [uribe.convers@gmail.com](mailto:uribe.convers@gmail.com), web:

26 [www.simonuribe.com](http://www.simonuribe.com)

27

28 Acknowledgements

29 We would like to thank S. Mathews for kindly sharing genomic DNA for some taxa used in this  
30 study. J. Sullivan, L. Harmon, E. Roalson, J. Beaulieu, B. Moore, N. Nürk, M. Pennell and XX  
31 anonymous reviewers for helpful suggestions or comments on the manuscript. J. Beaulieu, L.  
32 Harmon, C. Blair and the University of Idaho Institute for Bioinformatics and Evolutionary  
33 Studies (NIH/NCRR P20RR16448 and P20RR016454) for computational aid. Funding for this  
34 work was provided by NSF DEB-[1210895](#) to DCT for SUC, NSF DEB-[1253463](#) to DCT, and  
35 Graduate Student Research Grants to SUC from the Botanical Society of America (BSA), the  
36 Society of Systematic Biologists (SSB), the American Society of Plant Taxonomists (ASPT),  
37 and the University of Idaho Stillinger Herbarium Expedition Funds.

38

39

40

41

42

43

44

45

46

47 *Premise of the study:* Clade specific bursts in diversification are often associated with the  
48 evolution of key innovations. However, in groups with no obvious morphological innovations,  
49 observed upticks in diversification rates have also been attributed to the colonization of a new  
50 geographic environment. In this study, we explore the systematics, diversification dynamics, and  
51 historical biogeography of the plant clade Rhinanthaeae in the Orobanchaceae, with a special  
52 focus on the Andean clade of the genus *Bartsia* L..

53 *Methods:* We sampled taxa from every major lineage of Rhinanthaeae, as well as a representative  
54 sample of Andean *Bartsia* species. Using standard phylogenetic methods, we reconstructed  
55 evolutionary relationships, inferred divergence times among the major lineages of Rhinanthaeae,  
56 elucidated their biogeographic history, and investigated diversification dynamics.

57 *Key results:* We confirmed that the South American *Bartsia* species form a highly supported  
58 monophyletic group. Rhinanthaeae was estimated to have a median crown age of ca. 30 Ma, and  
59 Europe played an important role in the biogeographic history of the lineages. South America was  
60 first reconstructed in the biogeographic analyses around 9 Ma, and with a median age of 2.59  
61 Ma, this clade shows a significant uptick in diversification.

62 *Conclusions:* Increased net diversification of the South American clade corresponds with  
63 biogeographic movement into the New World. This happened at a time when the Andes were  
64 reaching the necessary elevation to host an alpine environment. Although a certain route of  
65 dispersal to South America cannot be described, we provide plausible hypotheses to how the  
66 group colonized the New World.

67 Keywords: *Bartsia*; *Bellardia*; Dispersification; Neobartsia; Orobanchaceae; Páramo;

68 Rhinanthaeae

69

70

71

72

73

74

75

76

77

78

79

80

81

82

83

84

85

86

87

88

89           The investigation of global patterns of biodiversity has a long history (e.g., Mittelbach et  
90 al., 2007). With the increase in our knowledge of phylogenetic relationships as well as methods  
91 for using phylogenies to understand diversification rates and biogeographic patterns (e.g., Ree et  
92 al., 2005; Alfaro et al., 2009), these global patterns can now be placed in an explicitly historical  
93 context (sensu Moore and Donoghue, 2007). Along these lines, differences in species richness  
94 between geographic areas have often been explained by climatic stability, age of the region,  
95 and/or niche conservatism that contributes to the slow, but steady, accumulation of species over  
96 time (Wiens and Donoghue, 2004). Likewise, clade specific bursts in net diversification  
97 (speciation minus extinction) are often associated with the evolution of novel morphologies,  
98 referred to as key innovations, such as nectar spurs in angiosperms (e.g., Hodges, 1997), molar  
99 characters in mammals (Woodburne et al., 2003), and feathers in birds (Ostrom, 1979). More  
100 recently, Moore and Donoghue (2007) demonstrated that in the plant families Adoxaceae and  
101 Valerianaceae, shifts in diversification rates were not correlated with the evolution of novel floral  
102 characters, but rather, with the movement into new geographic areas, and hypothesized that  
103 “dispersification” (dispersal and diversification) may play a larger role in shaping global  
104 biodiversity patterns than previously recognized. This is equivalent to the “key opportunity” of  
105 Donoghue and Sanderson (2015), and follows the hypothesis that in newly emerging  
106 environments, as long as the corridors for biogeographic movements are in place, these new  
107 areas will often be filled with lineages from environmentally similar areas where the relevant  
108 morphological and/or physiological adaptations are already in place (Donoghue, 2008).  
109 Empirical tests of these hypotheses not only require a robust estimate of phylogenetic  
110 relationships, but also the estimation of divergence times, diversification rates, and  
111 biogeographic patterns for the group of interest.

112           Various approaches have been taken to assess phylogenetic relationships, divergence  
113 times, and rates of diversification – each increasing our understanding of biodiversity and the  
114 way in which it has been produced. Bayesian analyses are now regularly used to estimate  
115 divergence times (e.g., Bacon et al., 2012; Drummond et al., 2012), most often performed in the  
116 program BEAST (Drummond and Rambaut, 2007), because the use of probabilistic priors  
117 accommodates for both phylogenetic uncertainty (i.e., topology and branch lengths), as well as  
118 the timing of calibration points. Diversification rate analyses have been instrumental to our  
119 understanding of disparities in clade richnesses across the tree of life. For example, Alfaro et al.  
120 (2009) suggested that several pulses of diversification instead of single events have shaped the  
121 current diversity of jawed vertebrates. Additionally, in the plant genus *Asclepias* L. (milkweeds)  
122 it has been shown that increases in the rate of diversification are tightly associated with the  
123 evolution of defense traits that prevent or minimize herbivory, and that this resulted in an  
124 adaptive radiation in the group (Agrawal et al., 2009). Finally, studies of Andean plants, e.g., the  
125 family Valerianaceae (Bell and Donoghue, 2005b) and the genus *Lupinus* L. (Hughes and  
126 Eastwood, 2006; Drummond et al., 2012), have shown that groups with North American  
127 temperate ancestors have elevated diversification rates in the Andes, given that they were “pre-  
128 adapted” to the conditions of the newly and unoccupied niche at the time that they colonized the  
129 Andes.

130           To investigate the influence of biogeographic movements on rates of diversification, we  
131 have chosen to study the mostly European clade Rhinanthaeae of the parasitic plant family  
132 Orobanchaceae (Wolfe et al., 2005; Bennett and Mathews, 2006; McNeal et al., 2013), with a  
133 particular focus on the genus *Bellardia* All., a clade of 48 species that are disproportionately  
134 distributed across two disjunct geographic regions. The majority of the species in *Bellardia* were

135 formerly part of the genus *Bartsia* L., but it has been recently recircumscribed (Scheunert et al.,  
136 2012) to better reflect the evolutionary history of its species. Prior to this taxonomic  
137 rearrangement, *Bartsia* (49 spp.) had two species distributed in the mountains of northeastern  
138 Africa (*B. decurva* Benth. and *B. longiflora* Benth.), one in the Mediterranean region (*B. trixago*  
139 L.), one in Scandinavia, the Alps, Greenland and the Hudson Bay region of northeastern North  
140 America (*B. alpina* L.), and the remaining 45 species distributed throughout the páramos of  
141 Andean South America (Molau, 1990). Broad-scale phylogenetic studies of Orobanchaceae  
142 (Wolfe et al., 2005; Bennett and Mathews, 2006) and the Rhinanthae clade (Těšitel et al., 2010)  
143 had suggested that *Bartsia* was not monophyletic, but Scheunert et al. (2012) were the first to  
144 include species from the complete geographic distribution of the genus, as well as the two  
145 species of the related Mediterranean genus *Parentucellia* Viv.. However, because their sampling  
146 only included two species of the South American clade of *Bartsia*, they chose to only reclassify  
147 these two species, leaving ca. 43 species in a large polyphyletic group with the monotypic  
148 lineage of *B. alpina* in Europe. The South American *Bartsia* species, which we will refer to here  
149 as the *Neobartsia* clade, are quite distinct from their Mediterranean counterparts (i.e., *Bellardia*  
150 *trixago*, and the two species of *Parentucellia* that were also moved to the expanded genus—  
151 *Bellardia latifolia* and *B. viscosa*) in multiple aspects. Ecologically, *Neobartsia* species grow at  
152 high elevation (ca. 3,000–5000 m) in wet environments while the Mediterranean species grow at  
153 low elevation (ca. 0–500 m) in seasonally dry environments. Geographically, *Neobartsia* is  
154 restricted to the Andes while the Mediterranean taxa are native to the Mediterranean region and  
155 more recently have been introduced to Australia, coastal Chile, and coastal western North  
156 America. Finally, the Mediterranean species all have reflexed corolla lips, usually associated  
157 with bee pollination, whereas a large number of the species in *Neobartsia* have erect corolla lips

158 that are thought to be associated with hummingbird pollination due to their tubular shape and the  
159 placement of reproductive parts.

160 Previous studies of the group have only included a minor fraction of the South American  
161 species richness, usually sampling only one or two species, making it difficult to assess the  
162 influence of biogeographic movements on rates of diversification across the clade. Here, we  
163 included representatives from all of the major lineages comprising the former genus *Bartsia*,  
164 including a morphologically and geographically representative sampling of the South American  
165 diversity, as well as a representative sampling of all known allied genera of the Rhinanthaeae  
166 clade of Orobanchaceae, to establish a robust and well-supported phylogeny of the clade based  
167 on both chloroplast and nuclear ribosomal DNA sequence data. We then use this phylogeny to  
168 estimate divergence times across the clade and to investigate the biogeographic history of the  
169 clade, with a special focus on the origin of the *Neobartsia* clade in Andean South America.  
170 Finally, we use all these analyses to test if increases in rates of diversification are indeed  
171 associated with biogeographic movements into newly formed environments, i.e.,  
172 “dispersification” sensu Moore and Donoghue (2007).

173

174

## MATERIALS AND METHODS

### 175 *Sampling*—

176 A total of 49 taxa were included in this study (Table 1), with newly collected specimens  
177 stored in airtight plastic bags filled silica gel desiccant in the field. Because our main focus is the  
178 diversification dynamics of the South American *Neobartsia* clade in the context of the disparate  
179 geographic distributions of the Old World species and the remainder of the mostly European  
180 Rhinanthaeae clade of Orobanchaceae, our sampling effort included representatives of 10 of the



181 11 genera thought to comprise the clade (Wolfe et al., 2005; Bennett and Mathews, 2006; Těšitel  
182 et al., 2010; Scheunert et al., 2012; McNeal et al., 2013). *Bellardia* and the *Neobartsia* clade are  
183 represented here by 15 South American species and two of the three Mediterranean taxa,  
184 *Bellardia trixago* (L.) All. and *Bellardia viscosa* (L.) Fisch. & C.A. Mey. The South American  
185 species were selected as to encompass the morphological and geographic diversity in the clade.  
186 Based on previous results (Olmstead et al., 2001; Wolfe et al., 2005; Bennett and Mathews,  
187 2006; Těšitel et al., 2010; Scheunert et al., 2012; McNeal et al., 2013) *Melampyrum* L. was used  
188 as the outgroup for the Rhinanthaeae clade.

189

#### 190 ***Molecular Methods***—

191 Total genomic DNA was extracted from silica gel-dried tissue or herbarium material  
192 using a modified 2X CTAB method (Doyle and Doyle, 1987). Two chloroplast (cp) regions—  
193 *trnT-trnF* region and the *rps16* intron—were amplified via polymerase chain reaction (PCR)  
194 using the *trn-a* and *trn-f* (Taberlet et al., 1991) and the *rps16\_F* and *rps16\_R* primers (Oxelman  
195 et al., 1997), respectively. The nuclear ribosomal (nr) internal transcribed spacer (ITS) and  
196 external transcribed spacer (ETS) regions were amplified using the ITS4 and ITS5 primers  
197 (Baldwin, 1992) and the ETS-B (Beardsley and Olmstead, 2002) and 18S-IGS (Baldwin and  
198 Markos, 1998), respectively. PCR profiles for all regions followed Tank and Olmstead (2008).  
199 When amplification of a region in one fragment was not possible, internal primers were used to  
200 amplify the region in multiple fragments. The primer pairs *trn-a/trnb*, *trnc/trn-d*, and *trn-e/trn-f*  
201 (Taberlet et al., 1991) were used to amplify the *trnT-trnF* region. Additionally, *Bellardia*  
202 specific internal primers were designed and used when these primer combinations failed  
203 (*trnT/trnL* intergenic spacer: *trnT-L\_iF* 5-CTTGGTTTTTCATCCGTAAAGG-3 and *trnT-L\_iR*

204 5–CCTTTACGGATGAAAACCAAG–3). Following Tank and Olmstead (2008), the  
205 *rps16*\_F/*rps16*\_iR and *rps16*\_iF/*rps16*\_2R primer combinations were used to amplify the *rps16*  
206 intron in two fragments. Similarly, the ITS5/ITS2 and ITS3/ITS4 primer combinations (Baldwin,  
207 1992) were used to amplify the ITS region in two fragments.

208 PCR products were purified by precipitation in a 20% polyethylene glycol 8000  
209 (PEG)/2.5 M NaCl solution and washed in 70% ethanol prior to sequencing. To ensure accuracy,  
210 we sequenced both strands of the cleaned PCR products on an ABI 3130xl capillary DNA  
211 sequencer (Applied Biosystems, Foster City, California, USA) using ABI BigDye v.3.1 cycle  
212 sequencing chemistry. Sequence data were edited and assembled for each region using the  
213 program Sequencher v.4.7 (Gene Codes Corp., Ann Arbor, Michigan, USA), and consensus  
214 sequences were generated and submitted to GenBank (GenBank accessions: ETS: KM408174–  
215 KM408207, ITS: KM408208–KM408238, *trnT*–*trnL*: KM408239–KM408278, *rps16*:  
216 KM408279–KM408316, *trnL*–*trnF*: KM434082–KM434123). When sequencing was not  
217 possible for any given species or gene region, GenBank sequences were used to reduce the  
218 amount of missing data in the final matrix (Table 1).

219

## 220 ***Phylogenetic Analyses***—

221 Although two separate cpDNA regions were sequenced, the evolutionary histories of the  
222 *trnT*–*trnF* region and the *rps16* intron are tightly linked due to the nonrecombining nature of the  
223 chloroplast genome, and thus, were treated as a single locus. The nrDNA regions (ITS and ETS)  
224 were also treated as a single locus, given that they are linked because of their physical proximity  
225 in the nrDNA repeat. We created three primary datasets with our two independent loci: 1)  
226 cpDNA only, 2) nrDNA only, and 3) a combined cpDNA and nrDNA dataset. Global alignments  
227 across the Rhinanthae clade were created for each gene region using the group–to–group profile

228 alignment method as implemented in Muscle v.3.6 (Edgar, 2004). This method takes advantage  
229 of previous knowledge about monophyly of the major lineages (e.g., Těšitel et al., 2010;  
230 Scheunert et al., 2012) and consists of lineage-specific alignments that are then iteratively  
231 aligned to one another resulting in fewer alignment ambiguities (Smith et al., 2009). These  
232 alignments were visually inspected and minor adjustments were made manually using Se-Al  
233 v.2.0a11 (Rambaut, 1996). Sites that could not be unambiguously aligned were excluded from  
234 the analyses. File format conversions and matrix concatenations were performed using the  
235 program Phyutility v.2.2 (Smith and Dunn, 2008).

236         A statistical selection of the best-fit model of nucleotide substitution according to the  
237 Akaike information criterion (AIC) was conducted independently for each gene region using the  
238 program jModelTest (Guindon and Gascuel, 2003; Posada, 2008). Based on these results,  
239 partitioned (by gene region) maximum likelihood (ML) analyses were performed on our three  
240 primary datasets using RAxML v. 7.2.4 (Stamatakis, 2006) with 1,000 replicates of  
241 nonparametric bootstrapping using the rapid bootstrap algorithm (Stamatakis et al., 2008). Every  
242 fifth bootstrap tree generated by the rapid bootstrap analyses was used as a starting tree for full  
243 ML searches and the trees with the highest ML scores were chosen. Likewise, partitioned  
244 Bayesian inference (BI) analyses were performed using the parallel version of MrBayes v3.1.2  
245 (Ronquist and Huelsenbeck, 2003) with the individual parameters unlinked across the data  
246 partitions. Analyses consisted of two independent runs with four Markov chains using default  
247 priors and heating values. Each independent run consisted of 15 million generations and was  
248 started from a randomly generated tree and was sampled every 1,000 generations. Convergence  
249 of the chains was determined by analyzing the plots of all parameters and the  $-\ln L$  using Tracer  
250 v.1.5 (Rambaut and Drummond, 2004). Stationarity was assumed when all parameters values

251 and the  $-\ln L$  had stabilized; the likelihoods of independent runs were considered  
252 indistinguishable when the average standard deviation of split frequencies was  $< 0.001$ .  
253 Consensus trees were obtained for each dataset using the `sumt` command in MrBayes. Finally,  
254 incongruencies between the cpDNA and the nrDNA topologies were investigated using the  
255 approximately unbiased (AU) test (Shimodaira, 2002) and the Shimodaira–Hasegawa (SH) test  
256 (Shimodaira and Hasegawa, 1999), as implemented in the program CONSEL (Shimodaira and  
257 Hasegawa, 2001).

258

### 259 *Divergence Time Estimation—*

260 To maximize the number of taxa and minimize the amount of missing data in our dating  
261 analyses, we reduced our combined dataset to include sequences for only the cpDNA *trnT–trnL*  
262 intergenic spacer and the nrDNA ITS region. This resulted in a dataset that included all 49 taxa  
263 and only 2% missing data, compared to 15% missing data for the complete dataset. Each gene  
264 was treated as a separate partition. To ensure convergence in divergence times, five independent  
265 runs were conducted using BEAST v.1.5.4 (Drummond and Rambaut, 2007). BEAST  
266 implements Markov Chain Monte Carlo (MCMC) methods that allow for uncertainty in both the  
267 topology and the calibration points, i.e., calibration points are treated as probabilistic priors,  
268 rather than point estimates (Ho and Phillips, 2009). It also implements an uncorrelated lognormal  
269 relaxed clock (UCLN) (Drummond et al., 2006), allowing every branch to have an independent  
270 substitution rate.

271 Each run was started from the resulting ML tree obtained for the dataset containing all  
272 regions, after performing a semiparametric rate smoothing based on penalized likelihood  
273 (Sanderson, 2002) in R (R Development Core Team, 2013) using the package Ape (Paradis et

274 al., 2004). Each run consisted of 100,000,000 generations sampled every 1000 trees. The models  
275 of nucleotide substitution were kept unlinked for both partitions and the tree priors were kept as  
276 default under the birth–death process.

277 Because of the mostly herbaceous habit of the species in Orobanchaceae, there are no  
278 known fossils for the family. This lack of fossils made the dating of our analyses dependent on  
279 secondary calibrations obtained from a previous study. Based on age estimates of an ITS  
280 molecular clock (Wolfe et al., 2005), a calibration point at the node containing every genus  
281 except *Melampyrum* (i.e., one node higher than the root) was used. This was done with a  
282 lognormal distribution prior with an offset of 25 million years (Ma), a mean of 0.9, and a  
283 standard deviation of 0.8, this way incorporating uncertainty in the calibration point. Because the  
284 use of this secondary calibration is far from ideal, to corroborate our calibration strategy, an  
285 additional analysis using the most recent uplift of the Andes as the calibration point (Simpson,  
286 1975; Burnham and Graham, 1999; Gregory-Wodzicki, 2000; Antonelli et al., 2009) was  
287 conducted with a lognormal distribution prior (offset of 1.7 Myr, a mean of 0.2 and an standard  
288 deviation of 0.6). This calibration prior was set at the node where the species in *Neobartsia*  
289 diverge from *B. viscosa*. This additional calibration scenario was conducted to assess the impact  
290 of alternative calibration points in the node ages.

291 Convergence of the parameters was monitored using Tracer v. 1.5 and the resulting trees  
292 were summarized using TreeAnnotator v.1.5.4 (Drummond and Rambaut, 2007) after 25% of the  
293 trees had been discarded as burn–in. Each of the five topologies and their node heights were  
294 visualized using FigTree v. 1.3.1 (Rambaut, 2006) and a final tree, representing the maximum  
295 clade credibility tree with information of the 95 percent highest posterior density (HPD), was  
296 obtained by combining the five runs using LogCombiner v.1.5.4 (Drummond and Rambaut,

297 2007) and by summarizing them with TreeAnnotator v.1.5.4.

298

299 ***Biogeographic Analyses—***

300 The biogeographic history of *Bellardia* and allied genera was reconstructed using the  
301 program Lagrange v. C++ (Ree and Smith, 2008). Lagrange implements the Dispersal–  
302 Extinction–Cladogenesis (DEC) model (Ree et al., 2005) to estimate the most likely ancestral  
303 geographic range based on current distributions of extant lineages. This model assumes  
304 extinction or dispersal by contraction or expansion of the ancestral geographic range,  
305 respectively. Additionally, the user is given the option to assign a dispersal probabilities matrix  
306 based on prior knowledge of connectivity between areas, incorporating valuable ancestral  
307 geographic information. However, most of this knowledge, at least for Northern Hemisphere  
308 temperate plants, is based on macrofossils of woody mesophytic taxa, e.g., *Quercus* (Tiffney and  
309 Manchester, 2001). Because the herbaceous genus *Bellardia* is almost completely restricted to  
310 alpine–like conditions, which separates this lineage from the ecological conditions in which  
311 mesophytic forest species are found, and the vast majority of the Rhinanthaeae clade is also  
312 herbaceous, we consider that biological routes for these types of taxa are less well understood  
313 (Donoghue and Smith, 2004). Therefore, we did not include a dispersal probability matrix in our  
314 analyses (see also Smith and Donoghue, 2010).

315 We used Lagrange on a posterior distribution of 1,000 randomly chosen trees (post burn–  
316 in) from our dating analyses. By inferring ancestral ranges over a posterior distribution of trees  
317 we are incorporating uncertainty in both topology as well as times of divergence (Smith, 2009;  
318 Smith and Donoghue, 2010; Beaulieu et al., 2013). We conducted three independent analyses  
319 with varying distributions of current taxa. The first analysis was performed with conservative

320 geographic ranges following Mabberley's Plant-Book (Mabberley, 2008), in which the genera  
321 have wider distributions, e.g., the genus *Euphrasia* L. has a north temperate distribution (Eurasia,  
322 Europe and Eastern North America). The second analysis included prior expert knowledge about  
323 the distribution of the genera based on published work, e.g., we followed the proposed Eurasian  
324 origin for the genus *Euphrasia* (Gussarova et al., 2008). The final analysis was based on species-  
325 specific distributions based on the explicit species that we sampled, i.e., species within a genus  
326 can have different distributions to account for endemisms and/or disparate distributions within a  
327 genus.

328 We considered species to be distributed in five distinct geographic areas: i) Eurasia  
329 (western Eurasia: the Balkan Peninsula and the Caucasus region), ii) Europe (including the  
330 Mediterranean climatic region in southern Europe and northern Africa), iii) Africa (montane  
331 northeastern Africa), iv) North America (Hudson Bay region of northeastern North America),  
332 and v) South America (including only the Andes). The results of the analyses were summarized  
333 in R. Following Beaulieu et al. (2013), we calculated Akaike weights for every biogeographic  
334 scenario reconstructed at every node in each tree separately. We then summed the Akaike  
335 weights for each node and averaged them across the distribution of trees, which resulted in  
336 composite Akaike weights ( $w_i$ ) for our biogeographic reconstructions. Furthermore, we  
337 examined the evidence for the most supported scenario by calculating an evidence ratio of this  
338 model versus all models (Burnham and Anderson, 2002). These were interpreted as relative  
339 evidence of one scenario being the most supported when comparing it with competing  
340 biogeographic hypotheses (Beaulieu et al., 2013).

341

342

343 ***Diversification Rates***—

344 Diversification rates analyses were conducted on the same posterior distribution of 1,000  
345 trees, as well as on the maximum clade credibility (MCC) tree using MEDUSA (Alfaro et al.,  
346 2009), which is an extension of the method described by Rabosky et al. (2007) and is available in  
347 the R package geiger 2.0 (Pennell et al., 2014). In Rabosky et al. (2007), two likelihoods are  
348 estimated for a dated tree: i) a phylogenetic likelihood that uses the timing of the splits on the  
349 backbone to estimate ML values for birth and death rates following the equations of Nee et al.  
350 (1994), and ii) a taxonomic likelihood that uses species richness along with the date of the splits,  
351 estimating diversification rates following Magallón and Sanderson (2001). MEDUSA (Alfaro et  
352 al., 2009) looks for shifts in diversification rates in a stepwise manner by comparing AIC scores  
353 of successively more complex models. This method requires complete sampling that is achieved  
354 by collapsing every clade to a single tip and then assigning clade richnesses to these tip lineages.  
355 We collapsed our trees into tips representing each of the major lineages of Rhinanthae, which in  
356 most cases corresponds to each of the genera. The following clade richnesses were used:  
357 *Neobartsia* clade (45 spp.), *Parentucellia* clade (2 spp.), *Bellardia* clade (1 sp.), *Odontites* clade  
358 (32 spp.), *Euphrasia* clade (350 spp.), *Rhinanthus* clade (45 spp.), *Melampyrum* clade (35 spp.),  
359 *Lathraea* clade (7 spp.), *Rhynchochrys orientalis* (1 spp.), *Rhynchochrys elephas* (1 spp.),  
360 *Rhynchochrys odontophylla* (1 spp.), *Rhynchochrys kurdica* (1 spp.), *Rhynchochrys stricta* (1  
361 spp.), *Rhynchochrys maxima* (1 spp.), *Bartsia alpina* (1 spp.), *Tozzia alpina* (1 spp.), *Hedbergia*  
362 *abyssinica* (1 spp.), *Hedbergia decurva* (1 spp.), *Hedbergia longiflora* (1 spp.).

363 To compare our MEDUSA results we conducted an additional analysis using the program  
364 SymmeTREE v1.0 (Chan and Moore, 2005). SymmeTREE is based on the topological  
365 distribution of species on the whole tree, which is compared to a distribution simulated on a tree



366 under the equal-rates Markov random branching model (EMR), where the probability of a  
367 branching event is constant throughout the tree (Yule, 1924). If a clade shows an unbalanced  
368 distribution of species richness when compared to its sister clade, then a shift in the rate of  
369 diversification is identified. SymmeTREE also estimates several whole tree statistics that are  
370 evaluated against their own simulated null distribution, i.e., a constant pure-birth model (Chan  
371 and Moore, 2005). To accommodate topological and temporal uncertainty, we assessed  
372 diversification rate shifts with SymmeTREE using default settings across a random set of 542  
373 trees from the posterior distribution of trees from our divergence time analysis; the full set of  
374 1,000 trees was not used due to computational limitations.

375

376

## RESULTS

### 377 *Molecular Methods*—

378 The cpDNA data set included the *trnT-trnF* region and the *rps16* intron and had a total  
379 length of 2,686 bp with 13% missing data (Table 1). Similarly, the nrDNA dataset included the  
380 ITS and ETS regions with a total of 1,134 bp and 17% missing data (Table 1). A combined data  
381 set was created from the cpDNA and the nrDNA matrices, with a total length of 3,820 bp and  
382 15% missing data (files deposited in the Dryad Digital Repository: *data will be submitted after*  
383 *acceptance of the manuscript*).

384

### 385 *Phylogenetic Analyses*—

386 Alignment of individual gene regions was straightforward requiring minor adjustments to  
387 the automated alignment strategy implemented in MUSCLE v. 3.6 (matrices and trees are  
388 available on TreeBase: *Temporary reviewer access*

389 [http://purl.org/phylo/treebase/phylows/study/TB2:S11528?x-access-](http://purl.org/phylo/treebase/phylows/study/TB2:S11528?x-access-code=334b76effd95e3f56eb4ffe0185fc9ad&format=html)  
390 [code=334b76effd95e3f56eb4ffe0185fc9ad&format=html](http://purl.org/phylo/treebase/phylows/study/TB2:S11528?x-access-code=334b76effd95e3f56eb4ffe0185fc9ad&format=html)). Some regions that could not be  
391 unambiguously aligned in the *trnT-trnL* intergenic spacer and in the ETS region were excluded  
392 from the analyses (*trnT-L*: alignment positions 519–529 and 587–620; ETS: alignment positions  
393 63–65, 83–85 and 152–158). Model selection for the cpDNA regions yielded the General Time  
394 Reversible model +  $\Gamma$  (GTR) (Rodríguez et al., 1990) for the *trnT-trnF* intergenic spacer, and the  
395 Transversion model +  $\Gamma$  (TVM) for the *rps16* intron. The ITS and ETS regions resulted in the  
396 selection of the GTR+I+ $\Gamma$  and Hasegawa–Kishino–Yano+  $\Gamma$  (HKY) models, respectively. To  
397 avoid the difficulties of estimating  $\Gamma$  and the invariable sites simultaneously (Ronquist and  
398 Huelsenbeck, 2003; Yang, 2006), the model of substitution GTR+ $\Gamma$  with an increase in the  
399 number of rate categories from four to six was preferred in the case of the ITS region.

400 Our results from every dataset (Fig. 1 for the combined dataset and Fig. 2 for the cpDNA  
401 and nrDNA datasets) are in concordance with those presented in previous Rhinanthae studies  
402 (Těšitel et al., 2010; Scheunert et al., 2012), and assessment of incongruences between the  
403 cpDNA and nrDNA datasets showed that these were either not significant, or if they were, the  
404 alternative topology was only weakly supported. For example, the well-supported relationships  
405 in the cpDNA dataset between *Tozzia alpina* and *Hedbergia*—or between *Odontites* and  
406 *Bellardia*—are not statistically significant when constrained in the nrDNA dataset. Conversely,  
407 the relationship between *H. abyssinica* var. *nykiensis* and *H. decurva* found in the cpDNA  
408 dataset is significant in the AU Test, but it is only moderately supported on the tree (BS 72, PP  
409 0.96) and it does not exist in the combined dataset (Table 2). An important new result from this  
410 study, which is based on the first widespread sampling of the group, is that the South American  
411 species indeed form a distinct clade, the *Neobartsia* clade, that is very well supported with a

412 posterior probability (PP) of 1.0 and a bootstrap support (BS) of 100. *Bellardia*—including the  
413 *Neobartsia* clade—is sister to *Odontites* (PP 1.0, BS 92) and together are sister to a clade  
414 comprised by *Hedbergia* and *Tozzia alpina* (PP 1.0, BS 93). The placement of the genus *Tozzia*  
415 was uncertain until now, although the support of our analyses is marginal (PP 0.94, BS 80).  
416 Finally, the genus *Euphrasia* is sister to the latter genera (PP 1, BS 100) and together form a  
417 clade sister to *Bartsia alpina* (PP 1, BS 100). This last clade is what Scheunert et al. (2012)  
418 referred to as the core Rhinanthaeae.

419

#### 420 ***Divergence Time Estimations***—

421       When the calibration point was placed at the node where *Melampyrum* diverged from the  
422 remaining genera, the South American *Neobartsia* clade was inferred to have a median age of  
423 2.59 Ma (1.51–4.08 Ma 95% HPD) (Table 3). The split between *Bellardia trixago* and the  
424 remaining species in the clade was estimated to have a median age of 8.73 Ma (5.12–12.76 Ma).  
425 The African clade diverged from *Tozzia alpina* 13.64 Ma (8.78–18.70 Ma), while the split of the  
426 European *Bartsia alpina* occurred 22.62 Ma (17.49–28.07 Ma). The root of the tree was  
427 estimated to have a median age of 30.65 Ma (25.55–38.83 Ma). Likewise, when the geological  
428 constraint was imposed, the *Neobartsia* clade had a median age of 2.63 Ma (1.97–3.58 Ma), and  
429 the divergence of *Bellardia trixago* from the remaining *Bellardia*–*Neobartsia* species occurred  
430 8.48 Ma (4.95–12.48 Ma). The African clade diverged from *Tozzia alpina* 13.51 Ma (8.69–18.75  
431 Ma), *Bartsia alpina* of 22.33 Ma (16.23–28.36 Ma), and the root of the tree was estimated at  
432 30.98 Ma (29.13–35.96 Ma). The age of the root is consistent with the date (35.5 Ma) inferred  
433 for this clade in an angiosperm wide analysis (Zanne et al., 2014). Because the results using  
434 different calibration strategies were within the 95 percent HPD of each other (see Table 3), we

435 used the root calibration analysis for subsequent biogeographic and diversification rate analyses.

436

### 437 ***Biogeographic Analyses***—

438 Our three different codings of current geographic distribution resulted in very similar  
439 ancestral reconstructions (Table 4). Given that so much work has been done in recent years for  
440 several of these groups, e.g., *Bartsia/Bellardia* (Molau, 1990), *Euphrasia* (Gussarova et al.,  
441 2008), and *Odontites* (Bolliger, 1996), we favored the second coding scenario where current  
442 distributions were based on expert knowledge, including recent phylogenetic and biogeographic  
443 studies (for a wide-scale example on campanulids see Beaulieu et al., 2013). The most recent  
444 common ancestor (mrca) of the Rhinanthae clade of Orobanchaceae was likely distributed in  
445 Europe with a composite Akaike weight ( $w_i$ ) of 0.31 and an evidence ratio of 1.82 (Table 2).  
446 This ancestral range is maintained throughout the backbone of the tree until the node where  
447 *Euphrasia* diverges from the rest of the genera ( $w_i = 0.43$ , evidence ratio = 1.95). Nevertheless, a  
448 European ancestral range becomes the most supported reconstruction again at the node of  
449 divergence of *Odontites* ( $w_i = 0.80$ , evidence ratio = 8.88). A South American ancestral range is  
450 included for the first time at the crown node of *Bellardia*, where a  $w_i$  0.26 supports a split  
451 between Europe and South America and a  $w_i$  of 0.18 supports an entirely European ancestral  
452 range; the evidence ratio between these two reconstructions is 1.44. The node where the  
453 *Neobartsia* clade diverges from the Mediterranean *Bellardia viscosa* is again supported by two  
454 competing models i) a split between Europe and South America ( $w_i = 0.53$ , evidence ratio = 1.51)  
455 and ii) one between South America and an area comprised of Europe and Eurasia ( $w_i = 0.35$ ).  
456 Additional results for other genera can be seen on figure 3 and summarized in Table 4.

457

458

459 **Diversification Rates—**

460 Our analyses discovered six shifts in the rate of net diversification ( $r$  = speciation minus  
461 extinction) in the Rhinanthae clade when performed over the posterior distribution of trees;  
462 three of these were also identified on the MCC tree. Importantly, the three shifts identified on the  
463 MCC tree corresponded to the shifts that occurred at the highest frequency in the analyses across  
464 the posterior distribution of trees. Because most of these analyses were conducted on a posterior  
465 distribution of trees to incorporate phylogenetic uncertainty (both temporal and topological), we  
466 report the mean net diversification rate of each shift ( $r_{mean}$ ) on the text and the ranges of these  
467 shifts in Table 5. For the three shifts found in the MCC tree, we also report that value ( $r_{mcc}$ ). The  
468 first two shifts found in our analyses correspond to shifts that were only present in less than 15  
469 percent of the trees and show minimal deviation from the background rate of the tree. One of  
470 these shifts is on the node subtending the core Rhinanthae ( $r_{mean} = 0.11$ , frequency = 0.07) and  
471 the other one involves the hemiparasitic genus *Rhinanthus* L. and the holoparasite *Lathraea* L.  
472 ( $r_{mean} = 0.17$ , frequency = 0.12). The latter shift could correspond to a change in life history from  
473 hemiparasitism to holoparasitism in *Lathraea*, but given the limited sampling of these two  
474 groups and the low frequency at which the shift was found we dare not comment further. The  
475 next shift involves a slowdown in the rate of *Bartsia alpina* ( $r_{mean} = -0.4$ ,  $r_{mcc} = 0$ ) and was the  
476 most frequent shift in the analyses (frequency = 1.17). The frequency higher than 1.0 for this  
477 node is an artifact of the way MEDUSA adds the shifts. When two sister clades each have a shift  
478 at their crown nodes, MEDUSA adds the parameters from both shifts and places the result on the  
479 stem leading to the two clades. Thus these shifts do not occur with a frequency higher than 1.0,  
480 but are very common. The fourth shift corresponds to an increase in net diversification ( $r_{mean} =$   
481 0.09) in the clade sister to *Bartsia alpina* and was found with a frequency of 0.32. An additional

482 shift was found in the clade comprised of *Tozzia alpina* and the genus *Hedbergia*, the shift was  
483 found in 75% of the trees ( $r_{mean} = 0.06$ ;  $r_{mcc} = 0.05$ ). Finally, a shift showing an uptick in net  
484 diversification rate was present for the *Neobartsia* clade, with a frequency of 0.40 ( $r_{mean} = 0.40$ ;  
485  $r_{mcc} = 0.79$ ).

486 In comparison, the results obtained with SymmeTREE evidenced fewer diversification  
487 shifts on the whole tree ( $p < 0.05$ ). Like the MEDUSA results, an increase in diversification rate  
488 was also leading to the clade sister to *Bartsia alpina* and was consistently found in every tree we  
489 analyzed (Table 5). A shift showing a slowdown in the *Tozzia+Hedbergia* clade was found to be  
490 marginally significant at  $p < 0.05$  ( $p = 0.067$ ) in every tree. If we were to choose a less stringent  
491 significance threshold (e.g.,  $p < 0.10$ ), this shift would be significant in 506 trees (93% of the  
492 distribution). The same is true for the shift involving the *Neobartsia* clade, where it was only  
493 found to be significant in 77 trees at  $p < 0.05$  (14%), but increased to 258 trees (48%) when the  
494 less stringent  $p$  value was chosen.

495

## 496 DISCUSSION

### 497 *Systematic Implications*—

498 Molau (1990) published a comprehensive monograph on the genus “*Bartsia*”, where he  
499 hypothesized that the species formed a monophyletic group that was sister to the African  
500 monotypic genus *Hedbergia*. Our phylogenetic results (Figs. 1 and 2), which are in agreement  
501 with those of Těšitel et al. (2010) and Scheunert et al. (2012), show clearly that *Bartsia* sensu  
502 Molau is polyphyletic, and that the new classification (sensu Scheunert et al., 2012) better  
503 reflects the disparate geographic distributions of these lineages, as well as their evolutionary  
504 histories. Previous studies have recovered the basal relationships within *Bellardia* as a polytomy

505 (Těšitel et al., 2010; Scheunert et al., 2012), where the position of *B. trixago*, *B. viscosa*, and *B.*  
506 *latifolia* is uncertain. Here, we recovered *Bellardia trixago* as the earliest divergent lineage but  
507 because we did not sample *B. latifolia*, we cannot be certain of the position of the other two taxa.  
508 The South American *Neobartsia* clade was highly supported in every analysis, and this is the  
509 first study to sample a geographically and morphologically representative diversity of the  
510 richness in this clade. These results provide strong evidence of the evolutionary distinctiveness  
511 of the *Neobartsia* clade with respect to the Mediterranean members of the expanded genus  
512 *Bellardia* (sensu Scheunert et al. 2012) – i.e., its unique geographic distribution and  
513 biogeographic history, the long divergence times from their Mediterranean relatives (~7.39 Ma),  
514 and the elevated diversification rates. Along with diagnostic morphological characters, we feel  
515 this justifies a reanalysis of the generic revision of Scheunert et al. (2012) with respect to the  
516 taxonomy in this clade, and this is the subject of ongoing taxonomic work in this clade.

517 Our cpDNA and nrDNA analyses placed the genus *Tozzia* in different positions in the  
518 tree, although these differences were not statistically significant (Table 2). Our combined  
519 analysis placed the genus as sister to *Hedbergia*, albeit with marginal support (PP 0.94, BS 80).  
520 While this relationship is in agreement with previous studies (Těšitel et al., 2010; Scheunert et  
521 al., 2012), further work will be necessary to confidently place this genus in the Rhinanthae  
522 clade. Lastly, the African genus *Hedbergia* showed interesting and likely problematic species  
523 delimitations. The taxon *H. abyssinica* var. *nykiensis* was sister to *H. decurva* in our cpDNA  
524 analyses, and its relationship to the other *H. abyssinica* varieties in the nrDNA dataset was  
525 weakly supported. This is the first time that varietal taxa for this group have been included in a  
526 molecular study, and highlights the necessity for a more detailed study on the clade.

527

528 ***Biogeography and Diversification Rates***—

529           Our divergence time and biogeographic results depicted in figure 3 illustrate evolutionary  
530 hypotheses regarding the current distribution of the Rhinanthaeae clade. As a reminder, our  
531 analyses were calibrated using dates obtained with the molecular rate of the ITS (Wolfe et al.,  
532 2005), and thus, they should be taken as estimates where some uncertainty is expected.  
533 Nevertheless, they provide an evolutionary foundation that helps explain the current distribution  
534 and the diversity of the South American *Neobartsia* clade. With no doubt, Europe played a major  
535 role, almost at every node, in the reconstruction of ancestral ranges in the Rhinanthaeae clade of  
536 Orobanchaceae. Although this is the first formal biogeographic analysis in the clade, these  
537 results are in line with the verbal biogeographic scenarios described in previous studies (Wolfe et  
538 al., 2005; Těšitel et al., 2010), but with slight differences in the description of the ancestral areas.  
539 Diversification of the majority of the genera was achieved in the European continent with  
540 subsequent migration events to Eurasia, northeastern North America, the Mediterranean region,  
541 Africa and South America. *Bartsia alpina* is a good example of a taxon with a purely European  
542 ancestral distribution but that is currently distributed in other parts of the world. This suggests  
543 that the current distribution was the result of a second and more recent migration into Greenland  
544 and northeastern North America sometime along its very long branch (Fig. 3). *Odontites* is  
545 another good example of a European radiation that has expanded its range to include Eurasia  
546 after the initial divergence. Moreover, the genus *Euphrasia*, which accounts for more than half of  
547 the members of the clade with ~400 species, was reconstructed as having a Europe/Eurasian  
548 ancestral range. The few species sampled in this study all have Eurasian distributions but the  
549 genus is currently considered to have a “bipolar” distribution (Gussarova et al., 2008), with  
550 species distributed in north temperate regions and extreme Austral areas. This pattern is



551 extremely interesting since it suggests that extinction and/or long distance dispersal have played  
552 a large role in shaping the current distribution of this large clade.

553         The Mediterranean region was not included as a distinct area in our reconstruction  
554 analyses, and therefore, some of the genera with current Mediterranean distributions were treated  
555 as European, e.g., *Rhynchocorys*, *Odontites*, *Bellardia trixago*, and *B. viscosa*. The  
556 Mediterranean climate, as recognized today, is a young environment formed only 2.3–3.2 Ma  
557 and it is the result of two main events: i) the establishment of the Mediterranean rhythm of dry  
558 summers and mild–cold winters ~3.2 Ma, and ii) the oldest xeric period know for the region ~2.2  
559 Ma (Zagwin, 1960; 1974; Suc, 1984). The crown clades for each of these genera were  
560 reconstructed to have a European ancestral distribution, which implies that their current ranges  
561 are the results of independent evolutions into the European Mediterranean climatic region not  
562 earlier than ~3.2 Ma.

563         This study is mainly focused on studying the disproportionate diversity of the *Neobartsia*  
564 clade in the Andes, and to propose plausible hypotheses for its distribution. The Andes are  
565 thought to have begun uplifting in the late Miocene (~10 Ma) but only reaching the necessary  
566 elevation to host alpine conditions in the late Pliocene or early Pleistocene 2–4 Ma (Simpson,  
567 1975; Burnham and Graham, 1999; Gregory-Wodzicki, 2000; Antonelli et al., 2009). In our  
568 biogeographic analyses, South America is reconstructed for the first time at the crown node of  
569 *Bellardia*, with a median age of 8.73 Ma (5.12–12.76 Ma), and then at the node where *Bellardia*  
570 *viscosa* and the *Neobartsia* clade diverge (median age of 7.39 Ma [4.21–11.24 Ma]).

571 These reconstructions, between 12.76 and 4.21 Ma, define an eight and a half million year  
572 window for the ancestor to have reached South America. There are two main land routes that  
573 were present during this time period, the North Atlantic Land Bridge (NALB) uniting

574 northeastern North America and western Europe, and the Bering Land Bridge between eastern  
575 Asia and western North America. Previous studies in the plant family Malpighiaceae (Davis et  
576 al., 2002; 2004), have suggested a migration route from South America to Africa starting in the  
577 early Oligocene (~30 Ma) via North America, the NALB, and Europe. The NALB was available  
578 from the early Eocene (~50 Ma) until the middle to late Miocene (~10–8 Ma) (Tiffney, 1985;  
579 Tiffney and Manchester, 2001; Denk et al., 2010; 2011), dates which overlap with our  
580 divergence time estimates (Table 3) and with the appearance of South America as an ancestral  
581 range in our biogeographic analyses. This allows for the possibility of an early dispersal from  
582 Europe into North America over this land bridge. Colonization of North America would have  
583 followed a stepwise migration to South America over the forming Isthmus of Panama and/or  
584 island chains sometime in the last 4.5 Ma (Coates et al., 2004; Kirby and MacFadden, 2005;  
585 Retallack and Kirby, 2007). An alternative stepwise migration scenario for the South American  
586 clade's colonization of the Andes involves a migration route through Beringia. This land bridge,  
587 which was available on–and–off from ~58–3.5 Ma (Hopkins, 1967; Tiffney and Manchester,  
588 2001; Tiffney, 2008), has been proposed as a route for several groups found both in eastern Asia,  
589 western north America, and the Andes—e.g., Valerianaceae (Moore and Donoghue, 2007). This  
590 migration scenario is also plausible since Eurasia, Europe, and South America were  
591 reconstructed as the second most supported ancestral range at the node of divergence of the  
592 South American clade ( $w_i = 0.35$ ).

593 Both of these stepwise migration scenarios rely completely on North America as an  
594 intermediary step where the South American ancestor possibly diversified, migrated, and finally  
595 went extinct. Unfortunately, there is no fossil record in the Rhinanthaeae clade (or in  
596 Orobanchaceae), and thus, no physical evidence is available to support either of these

597 hypotheses.

598 Molau (1990) hypothesized that the *Neobartsia* clade had colonized the Andes via a  
599 long-distance dispersal from Africa, sometime in the early Pliocene (~5 Ma). This hypothesis  
600 seemed plausible at the time when no phylogenetic evidence was available for the clade, but now  
601 that it is clear that the former genus *Bartsia* is polyphyletic and the two African species  
602 (*Hebergia decurva*, *H. longifolia*) are not sister to the South American species, there is no longer  
603 support for this hypothesis. Nevertheless, there is a third hypothesis that does rely on long-  
604 distance dispersal, but rather from Mediterranean Europe/north Africa to Andean South America  
605 (or, alternatively, from somewhere in North America following a land bridge migration from the  
606 Old World). Many plants are dispersed over long distances by water (e.g., *Cocos* L.), birds (e.g.,  
607 *Pisonia* L.), or wind (e.g., *Taraxacum* F.H. Wigg.), and physiological and morphological  
608 adaptations to float, adhere, or fly are common (reviewed in Howe and Smallwood, 1982). The  
609 seeds of *Bellarida*–*Neobartsia* are enclosed in a dry dehiscent capsule that contains between 20–  
610 200 small seeds (0.3–2 mm) per fruit, each equipped with 6–13 short wings or ridges (Molau,  
611 1990). Although these seeds are light and have wings making them at first glance suitable for  
612 long distance traveling, it has been estimated that their mean dispersal distance is 0.3 meters, at  
613 least in *Bartsia alpina* (Molau, 1990). The short mean dispersal distance is in strong  
614 disagreement with the distance that a seed would need to travel from the Mediterranean region to  
615 the New World (~7,000 km/~4,000 mi). Nevertheless, there is a known constant storm track  
616 from western Africa (including the northwestern African Mediterranean climatic region) that  
617 crosses the Atlantic Ocean into the Caribbean and the Americas, and recent evidence has shown  
618 that there are major influxes of African dust in southern North America (Bozlaker et al., 2013),  
619 northeastern South America (Prospero et al., 2014), and the Caribbean basin (Prospero and

620 Mayol-Bracero, 2013). This opens the possibility for seeds of a Mediterranean ancestor to have  
621 been picked up and carried over to the New World. Although at first this may seem unlikely, it is  
622 important to point out that a single seed may be sufficient for the colonization of a new habitat,  
623 and that the eight and a half million year time window coupled with the large amounts (~200) of  
624 seeds that are produced in each capsule, increase the probability for this event to have happened.

625 At this point we cannot accept or reject any of the biogeographic hypotheses described  
626 above—the two stepwise migrations through North America or the long–distance dispersal from  
627 the Mediterranean climatic region—and it highlights the difficulty of inferring ancestral  
628 colonization routes even when using modern ancestral range reconstruction methods (see Tripp  
629 and McDade, 2014), especially with a non–existent fossil record. Nevertheless it is interesting to  
630 study and discuss some of the caveats that these hypotheses have. The route over the NALB  
631 requires that the migration from the Old World occurred sometime between 12–8 Ma, which  
632 based on palynological evidence (Denk et al., 2010; 2011) is the latest time that this land bridge  
633 was available. This timeframe overlaps with the oldest estimates of our dating analyses (5.12–  
634 12.76 Ma), but leaves a narrower window of time for a stepwise migration to have occurred.  
635 Furthermore, the warmer temperatures in eastern North America during the late Miocene would  
636 possibly have affected the migration of a presumably alpine adapted ancestor through the NALB.  
637 Conversely, the Bering Land Bridge was available until ~3.5 Ma, which overlaps completely  
638 with both the divergence of the South American clade from *Bellardia viscosa* (4.21–11.24 Ma),  
639 as well as with the split between *Bellardia trixago* and the other members of the *Bellardia*–  
640 *Neobartsia* clade 5.12–12.76 Ma. Moreover, this more recent route allows for the world to cool  
641 down during the Pliocene (Tiffney and Manchester, 2001), which may have facilitated the  
642 migration. Importantly, with either route, a stepwise migration hypothesis implies that the

643 ancestral lineage (and any of its descendants) would have then gone extinct thereafter in North  
644 America and in eastern Asia (if the Bering Land Bridge route is considered).

645 To investigate if these biogeographic movements have affected the rate at which clades  
646 are diversifying (i.e., “dispersification”), we need to assess if the shifts found in our analyses  
647 correlate with a movement into a new area or if there is something else, e.g., a morphological  
648 change, that has triggered them. Regardless of the reason, investigating shifts of diversification  
649 and the location of these on a phylogenetic tree is extremely helpful when trying to understand  
650 disparities in species richnesses across related clades. The comparison of two methods that are  
651 based on different tenets, a stepwise model testing approach vs. a topological imbalance  
652 approach (MEDUSA and SymmeTREE, respectively), allowed us to i) better evaluate the  
653 performance of different approaches used to identify shifts in diversification, while ii) making  
654 results shared by both methods robust and reliable. This comparison also showed the advantages  
655 of using a stepwise model testing approach and a method that incorporates extinction. Our  
656 MEDUSA analysis found six shifts across the posterior, and three when using the MCC tree; two  
657 of these six identified shifts represent a slowdown in net diversification. One of these  
658 slowdowns, which is the only shift consistently found by SymmeTREE at  $p < 0.01$ , across the  
659 posterior, and in the MCC tree, corresponds to the node where *Bartsia alpina* diverges from the  
660 rest of the core Rhinanthae 22.62 Ma. The extremely low diversification rate and its very long  
661 branch indicate that this species is likely the only extant member of a lineage that has had  
662 historically very low speciation rates or high extinction rates, or both. The first significant  
663 increase in net diversification rates was found at the node where the genus *Euphrasia* diverges  
664 from other genera 19.25 Ma. This genus includes ~400 species that encompass more than 80% of  
665 the species richness of Rhinanthae, estimated to be ~528 spp. (Mabberley, 2008). Based on our

666 limited sampling of this group, we cannot identify an apparent change in morphology or  
667 geography in the genus, and thus, no evident cause for this shift can be assessed with these data.  
668 Nevertheless, given the age and very high diversity of the clade, this shift is not surprising.  
669 However, it is important to point out that because we collapsed clades at the generic level to  
670 incorporate unsampled diversities, the present shift might not be the only one in *Euphrasia* and  
671 that clades within the genus may also have shifts of their own, where there might be an apparent  
672 change in either morphology or geography.

673         We also identified an increased rate of net diversification in the South American  
674 *Neobartsia* clade. We hypothesize that the clade underwent a similar pattern as seen in other  
675 Andean radiations, e.g. the family Valerianaceae and the genus *Lupinus* (Bell and Donoghue,  
676 2005a; Hughes and Eastwood, 2006, respectively), where their North American ancestor was  
677 “pre-adapted” to cold environments making the colonization of the high Andes, and further  
678 radiation, easier (Donoghue 2008). The *Neobartsia* clade has a median divergence time of 2.59  
679 Ma and a mean diversification rate of 0.40, however, when the analysis is performed on the  
680 MCC tree, the net diversification almost doubles ( $r_{mcc} = 0.79$ ). The large difference in values  
681 implies that although the shift was only identified in 40% of the posterior distribution of trees,  
682 when detected, the rate can be nearly four times higher than the background rate of the tree  
683 (background  $r_{mean} = 0.22$ ). Based on the very short branches within the clade, its young age, and  
684 the genetic similarity between the species included in this study, this shift likely resulted in a  
685 rapid radiation event where the movement to and colonization of the high Andes acted as a  
686 trigger to increased diversification. As the Andes were uplifting, the creation of new vacant  
687 niches and the simulation of alpine conditions promoted the radiation into the diversity that we  
688 see today. Accordingly, this is a another example of how phylogenetic niche conservatism and

689 the movement into a new geographic area, can lead to a high number of species in a relatively  
690 short period of time without the appearance of morphological key innovation, which is what  
691 Moore and Donoghue (2007) referred to as “dispersification”.

692

### 693 ***Conclusions***—

694 This study places the *Neobartsia* clade in the context of a robust and well-supported  
695 phylogeny within the Rhinanthaeae clade of Orobanchaceae. This is the first study to study this  
696 clade in an explicitly temporal framework, with detailed divergence time estimates for the clade.  
697 Here, we focused primarily on the colonization and diversification of Andean South America  
698 ~2.59 Ma. This date correlates well with the necessary age for the Andes to have acquired the  
699 adequate elevation to simulate alpine conditions for the establishment of this temperate, largely  
700 alpine clade in South America. Given that the South American clade is sister to a Mediterranean  
701 taxon, we hypothesized three biogeographic scenarios for the colonization of the Andes. The first  
702 route involves the NALB and North America as a stepwise migration route from Europe ~12–8  
703 Ma, whereas the second hypothesis involves a westerly route from Europe through Asia, the  
704 Bering Land Bridge, and North America ~12–4 Ma. Both of these scenarios share a second  
705 migration from North America to South America over the forming Isthmus of Panama and/or  
706 island chains in the mid to late Pliocene ~4.5–3.13 Ma, which gave rise to the *Neobartsia* clade,  
707 and high levels of extinction throughout Asia and/or North American. Finally, the third  
708 hypothesis involves a long-distance dispersal from the Mediterranean climatic region (Europe  
709 and northern Africa) to South America. At this point however, we cannot accept or reject any of  
710 the previously described hypotheses. Regardless of the biogeographic route taken, once the  
711 South American ancestor reached the Andes, it was able to diversify rapidly in the vacant niches

712 in the páramos. The greater diversification rates in the *Neobartsia* clade help explain the species  
713 richness found in the Andes today and support the idea that the “key opportunity” of geographic  
714 movement into a new area may trigger high diversification without the necessity of the evolution  
715 of morphological key innovations, and this may be especially true when the colonizing ancestral  
716 lineage is “pre-adapted” to the new conditions it encounters.

717

718

#### LITERATURE CITED

- 719 AGRAWAL, A.A., M. FISHBEIN, R. HALITSCHKE, A.P. HASTINGS, D.L. RABOSKY, AND S.  
720 RASMANN. 2009. Evidence for adaptive radiation from a phylogenetic study of plant  
721 defenses. *Proceedings of the National Academy of Sciences* 106: 18067–18072.
- 722 ALFARO, M.E., F. SANTINI, C. BROCK, H. ALAMILLO, A. DORNBURG, D. RABOSKY, G.  
723 CARNEVALE, AND L. HARMON. 2009. Nine exceptional radiations plus high turnover explain  
724 species diversity in jawed vertebrates. *Proceedings of the National Academy of Sciences*  
725 106: 13410.
- 726 ANTONELLI, A., J.A.A. NYLANDER, C. PERSSON, AND I. SANMARTÍN. 2009. Tracing the impact of  
727 the Andean uplift on Neotropical plant evolution. *Proceedings of the National Academy of*  
728 *Sciences* 106: 9749–9754.
- 729 BACON, C.D., W.J. BAKER, AND M.P. SIMMONS. 2012. Miocene Dispersal Drives Island  
730 Radiations in the Palm Tribe Trachycarpeae (Arecaceae). *Systematic Biology* 61: 426–442.
- 731 BALDWIN, B.G. 1992. Phylogenetic Utility of the Internal Transcribed Spacers of Nuclear  
732 Ribosomal DNA in Plants: An Example from the Compositae. *Molecular phylogenetics and*  
733 *evolution* 1: 3–16.
- 734 BALDWIN, B.G., AND S. MARKOS. 1998. Phylogenetic Utility of the External Transcribed Spacer  
735 (ETS) of 18S–26S rDNA: Congruence of ETS and ITS Trees of Calycadenia (Compositae).  
736 *Molecular phylogenetics and evolution* 10: 449–463.
- 737 BEARDSLEY, P.M., AND R.G. OLMSTEAD. 2002. Redefining Phrymaceae: the placement of  
738 *Mimulus*, tribe Mimuleae, and *Phryma*. *American Journal of Botany* 89: 1093–1102.
- 739 BEAULIEU, J.M., D.C. TANK, AND M.J. DONOGHUE. 2013. A Southern Hemisphere origin for  
740 campanulid angiosperms, with traces of the break-up of Gondwana. *BMC Evolutionary*  
741 *Biology* 13: 80.
- 742 BELL, C., AND M. DONOGHUE. 2005a. Dating the Dipsacales: comparing models, genes, and  
743 evolutionary implications. *American Journal of Botany* 92: 284.



- 744 BELL, C., AND M. DONOGHUE. 2005b. Phylogeny and biogeography of Valerianaceae  
745 (Dipsacales) with special reference to the South American valerians. *Organisms Diversity &*  
746 *Evolution* 5: 147–159.
- 747 BENNETT, J.R., AND S. MATHEWS. 2006. Phylogeny of the parasitic plant family Orobanchaceae  
748 inferred from phytochrome A. *American Journal of Botany* 93: 1039–1051.
- 749 BOLLIGER, M. 1996. Monographie der Gattung *Odontites* (Scrophulariaceae) sowie der  
750 verwandten Gattungen *Macrosyringion*, *Odontitella*, *Bornmuellerantha* und *Bartsiella*.  
751 *Willdenowia* 26: 37–168.
- 752 BOZLAKER, A., J.M. PROSPERO, M.P. FRASER, AND S. CHELLAM. 2013. Quantifying the  
753 contribution of long-range Saharan dust transport on particulate matter concentrations in  
754 Houston, Texas, using detailed elemental analysis. *Environmental science & technology* 47:  
755 10179–10187.
- 756 BURNHAM, K.P., AND D.R. ANDERSON. 2002. Model selection and multi-model inference: a  
757 practical information-theoretic approach. Second. Springer New York.
- 758 BURNHAM, R.J., AND A. GRAHAM. 1999. The history of neotropical vegetation: new  
759 developments and status. *Annals of the Missouri Botanical Garden* 546–589.
- 760 CHAN, K., AND B. MOORE. 2005. SymmeTREE: whole-tree analysis of differential  
761 diversification rates. *Bioinformatics* 21: 1709.
- 762 COATES, A., L. COLLINS, M. AUBRY, AND W. BERGGREN. 2004. The geology of the Darien,  
763 Panama, and the late Miocene-Pliocene collision of the Panama arc with northwestern South  
764 America. *Geological Society of America Bulletin* 116: 1327.
- 765 DAVIS, C.C., C.D. BELL, S. MATHEWS, AND M.J. DONOGHUE. 2002. Laurasian migration explains  
766 Gondwanan disjunctions: evidence from Malpighiaceae. *Proceedings of the National*  
767 *Academy of Sciences of the United States of America* 99: 6833–6837.
- 768 DAVIS, C.C., P.W. FRITSCH, C.D. BELL, AND S. MATHEWS. 2004. High-latitude Tertiary  
769 migrations of an exclusively tropical clade: evidence from Malpighiaceae. *International*  
770 *Journal of Plant Sciences* 165: S107–S121.
- 771 DENK, T., F. GRIMSSON, AND R. ZETTER. 2010. Episodic migration of oaks to Iceland: Evidence  
772 for a North Atlantic “land bridge” in the latest Miocene. *American Journal of Botany* 97:  
773 276–287.
- 774 DENK, T., F. GRÍMSSON, R. ZETTER, AND L.A. SÍMONARSON. 2011. The Biogeographic History of  
775 Iceland – The North Atlantic Land Bridge Revisited. *In* Topics in Geobiology, Topics in  
776 Geobiology, 647–668. Springer Netherlands, Dordrecht.
- 777 DONOGHUE, M., AND S. SMITH. 2004. Patterns in the assembly of temperate forests around the  
778 Northern Hemisphere. *Philosophical Transactions B* 359: 1633.

- 779 DONOGHUE, M.J. 2008. A phylogenetic perspective on the distribution of plant diversity.  
780 *Proceedings of the National Academy of Sciences of the United States of America* 105:  
781 11549–11555.
- 782 DONOGHUE, M.J., AND M.J. SANDERSON. 2015. Confluence, synnovation, and depauperons in  
783 plant diversification. *The New Phytologist*.
- 784 DOYLE, J.J., AND J.L. DOYLE. 1987. A rapid DNA isolation procedure for small quantities of  
785 fresh leaf tissue. *Phytochemical Bulletin* 19: 11–15.
- 786 DRUMMOND, A., AND A. RAMBAUT. 2007. BEAST: Bayesian evolutionary analysis by sampling  
787 trees. *BMC Evolutionary Biology* 7: 214.
- 788 DRUMMOND, A., S. HO, M. PHILLIPS, AND A. RAMBAUT. 2006. Relaxed phylogenetics and dating  
789 with confidence. *PLoS Biology* 4: 699.
- 790 DRUMMOND, C.S., R.J. EASTWOOD, S.T.S. MIOTTO, AND C.E. HUGHES. 2012. Multiple  
791 Continental Radiations and Correlates of Diversification in Lupinus (Leguminosae): Testing  
792 for Key Innovation with Incomplete Taxon Sampling. *Systematic Biology* 61: 443–460.
- 793 EDGAR, R.C. 2004. MUSCLE: multiple sequence alignment with high accuracy and high  
794 throughput. *Nucleic Acids Research* 32: 1792–1797.
- 795 GREGORY-WODZICKI, K. 2000. Uplift history of the Central and Northern Andes: a review.  
796 *Geological Society of America Bulletin* 112: 1091.
- 797 GUINDON, S., AND O. GASCUEL. 2003. A simple, fast, and accurate algorithm to estimate large  
798 phylogenies by maximum likelihood. *Systematic Biology* 52: 696–704.
- 799 GUSSAROVA, G., M. POPP, E. VITEK, AND C. BROCHMANN. 2008. Molecular phylogeny and  
800 biogeography of the bipolar Euphrasia (Orobanchaceae): recent radiations in an old genus.  
801 *Molecular Phylogenetics and Evolution* 48: 444–460.
- 802 HO, S., AND M. PHILLIPS. 2009. Accounting for Calibration Uncertainty in Phylogenetic  
803 Estimation of Evolutionary Divergence Times. *Systematic Biology* 58: 367–380.
- 804 HODGES, S.A. 1997. Floral Nectar Spurs and Diversification. *International Journal of Plant  
805 Sciences* 158: S81–S88.
- 806 HOPKINS, D.M. 1967. The Bering land bridge. Stanford University Press, Stanford, CA.
- 807 HOWE, H.F., AND J. SMALLWOOD. 1982. Ecology of Seed Dispersal. *Annual Review of Ecology  
808 and Systematics* 13: 201–228.
- 809 HUGHES, C., AND R. EASTWOOD. 2006. Island radiation on a continental scale: exceptional rates  
810 of plant diversification after uplift of the Andes. *Proceedings of the National Academy of  
811 Sciences* 103: 10334.

- 812 KIRBY, M.X., AND B. MACFADDEN. 2005. Was southern Central America an archipelago or a  
813 peninsula in the middle miocene? A test using land-mammal body size. *Palaeogeography,*  
814 *Palaeoclimatology, Palaeoecology* 228: 193–202.
- 815 MABBERLEY, D.J. 2008. Mabberley’s plant-book: a portable dictionary of plants, their  
816 classification and uses. 3rd ed. Cambridge, UK. University Press.
- 817 MAGALLÓN, S., AND M.J. SANDERSON. 2001. Absolute diversification rates in angiosperm clades.  
818 *Evolution* 55: 1762–1780.
- 819 MCNEAL, J.R., J.R. BENNETT, A.D. WOLFE, AND S. MATHEWS. 2013. Phylogeny and origins of  
820 holoparasitism in Orobanchaceae. *American Journal of Botany* 100: 971–983.
- 821 MITTELBACH, G.G., D.W. SCHEMSKE, H.V. CORNELL, A.P. ALLEN, J.M. BROWN, M.B. BUSH,  
822 S.P. HARRISON, ET AL. 2007. Evolution and the latitudinal diversity gradient: speciation,  
823 extinction and biogeography. *Ecology Letters* 10: 315–331.
- 824 MOLAU, U. 1990. The genus *Bartsia* (Scrophulariaceae - Rhinanthoideae ). *Opera Botanica* 102:  
825 1–100.
- 826 MOORE, B.R., AND M.J. DONOGHUE. 2007. Correlates of diversification in the plant clade  
827 Dipsacales: geographic movement and evolutionary innovations. *The American Naturalist*  
828 170 Suppl 2: S28–55.
- 829 NEE, S., R.M. MAY, AND P.H. HARVEY. 1994. The reconstructed evolutionary process.  
830 *Philosophical Transactions of the Royal Society of London. Series B, Biological Sciences*  
831 344: 305–311.
- 832 OLMSTEAD, R.G., C.W. DEPAMPHILIS, A.D. WOLFE, N.D. YOUNG, W.J. ELISONS, AND P.A.  
833 REEVES. 2001. Disintegration of the Scrophulariaceae. *American Journal of Botany* 88: 348–  
834 361.
- 835 OSTROM, J.H. 1979. Bird flight: how did it begin? *American Scientist* 67: 46–56.
- 836 OXELMAN, B., M. LIDÉN, AND D. BERGLUND. 1997. Chloroplast rps16 intron phylogeny of the  
837 tribe Sileneae (Caryophyllaceae). *Plant Systematics and Evolution* 206: 393–410.
- 838 PARADIS, E., J. CLAUDE, AND K. STRIMMER. 2004. APE: Analyses of Phylogenetics and  
839 Evolution in R language. *Bioinformatics* 20: 289–290.
- 840 PENNELL, M.W., J.M. EASTMAN, G.J. SLATER, J.W. BROWN, J.C. UYEDA, R.G. FITZJOHN, M.E.  
841 ALFARO, AND A.L.J. HARMON. 2014. geiger v2. 0: an expanded suite of methods for fitting  
842 macroevolutionary models to phylogenetic trees. *Bioinformatics*.
- 843 POSADA, D. 2008. jModelTest: phylogenetic model averaging. *Mol Biol Evol* 25: 1253–1256.
- 844 PROSPERO, J.M., AND O.L. MAYOL-BRACERO. 2013. Understanding the Transport and Impact of  
845 African Dust on the Caribbean Basin. *Bulletin of the American Meteorological Society* 94:

- 846 1329–1337.
- 847 PROSPERO, J.M., F.X. COLLARD, J. MOLINIÉ, AND A. JEANNOT. 2014. Characterizing the annual  
848 cycle of African dust transport to the Caribbean Basin and South America and its impact on  
849 the environment and air quality. *Global Biogeochemical Cycles* 29:.
- 850 R DEVELOPMENT CORE TEAM. 2013. R: A language and environment for statistical computing. *R*  
851 *Foundation for Statistical Computing, Vienna, Austria. ISBN 3-900051-07-0, URL*  
852 *<http://www.R-project.org>.*
- 853 RABOSKY, D.L., S.C. DONNELLAN, A.L. TALABA, AND I.J. LOVETTE. 2007. Exceptional among-  
854 lineage variation in diversification rates during the radiation of Australia's most diverse  
855 vertebrate clade. *Proceedings of the Royal Society B: Biological Sciences* 274: 2915–2923.
- 856 RAMBAUT, A. 2006. FigTree. *Institute of Evolutionary Biology, University of Edinburgh,*  
857 *Edinburgh, UK. Available at <http://tree.bio.ed.ac.uk/software/figtree/>.*
- 858 RAMBAUT, A. 1996. Se-AL: Sequence alignment editor. *Institute of Evolutionary Biology,*  
859 *University of Edinburgh, Edinburgh, UK. Available at <http://tree.bio.ed.ac.uk/software/seal/>.*
- 860 RAMBAUT, A., AND A.J. DRUMMOND. 2004. Tracer. *University of Edinburgh, Edinburgh, UK.*  
861 *Available at <http://tree.bio.ed.ac.uk/software/tracer/>.*
- 862 REE, R., B. MOORE, C. WEBB, AND M. DONOGHUE. 2005. A likelihood framework for inferring  
863 the evolution of geographic range on phylogenetic trees. *Evolution* 59: 2299–2311.
- 864 REE, R.H., AND S.A. SMITH. 2008. Maximum Likelihood Inference of Geographic Range  
865 Evolution by Dispersal, Local Extinction, and Cladogenesis. *Systematic Biology* 57: 4–14.
- 866 RETALLACK, G., AND M. KIRBY. 2007. Middle Miocene global change and paleogeography of  
867 Panama. *Palaios* 22: 667–679.
- 868 RODRÍGUEZ, F., J.L. OLIVER, A. MARÍN, AND J.R. MEDINA. 1990. The general stochastic model  
869 of nucleotide substitution. *Journal of Theoretical Biology* 142: 485–501.
- 870 RONQUIST, F., AND J.P. HUELSENBECK. 2003. MrBayes 3: Bayesian phylogenetic inference under  
871 mixed models. *Bioinformatics* 19: 1572–1574.
- 872 SANDERSON, M.J. 2002. Estimating absolute rates of molecular evolution and divergence times: a  
873 penalized likelihood approach. *Molecular Biology and Evolution* 19: 101–109.
- 874 SCHEUNERT, A., A. FLEISCHMANN, C. OLANO-MARIN, C. BRÄUCHLER, AND G. HEUBL. 2012.  
875 Phylogeny of tribe Rhinanthae (Orobanchaceae) with a focus on biogeography, cytology  
876 and re-examination of generic concepts. *Taxon* 61: 1269–1285.
- 877 SHIMODAIRA, H. 2002. An approximately unbiased test of phylogenetic tree selection. *Systematic*  
878 *Biology*.

- 879 SHIMODAIRA, H., AND M. HASEGAWA. 2001. CONSEL: for assessing the confidence of  
880 phylogenetic tree selection. *Bioinformatics* 17: 1246–12461247.
- 881 SHIMODAIRA, H., AND M. HASEGAWA. 1999. Multiple comparisons of log-likelihoods with  
882 applications to phylogenetic inference. *Molecular Biology and Evolution* 16: 1114.
- 883 SIMPSON, B. 1975. Pleistocene changes in the flora of the high tropical Andes. *Paleobiology* 273–  
884 294.
- 885 SMITH, S. 2009. Taking into account phylogenetic and divergence-time uncertainty in a  
886 parametric biogeographical analysis of the Northern Hemisphere plant clade Caprifolieae.  
887 *Journal of Biogeography* 36: 2324–2337.
- 888 SMITH, S., AND C. DUNN. 2008. Phyutility: a phyloinformatics tool for trees, alignments and  
889 molecular data. *Bioinformatics* 24: 715.
- 890 SMITH, S., AND M. DONOGHUE. 2010. Combining Historical Biogeography with Niche Modeling  
891 in the Caprifolium Clade of Lonicera (Caprifoliaceae, Dipsacales). *Systematic Biology*.
- 892 SMITH, S.A., J.M. BEAULIEU, AND M.J. DONOGHUE. 2009. Mega-phylogeny approach for  
893 comparative biology: an alternative to supertree and supermatrix approaches. *BMC*  
894 *Evolutionary Biology* 9: 37.
- 895 STAMATAKIS, A. 2006. RAxML-VI-HPC: maximum likelihood-based phylogenetic analyses  
896 with thousands of taxa and mixed models. *Bioinformatics* 22: 2688–2690.
- 897 STAMATAKIS, A., P. HOOVER, AND J. ROUGEMONT. 2008. A Rapid Bootstrap Algorithm for the  
898 RAxML Web Servers. *Systematic Biology* 57: 758–771.
- 899 SUC, J.P. 1984. Origin and evolution of the Mediterranean vegetation and climate in Europe.  
900 *Nature* 307: 429–432.
- 901 TABERLET, P., L. GIELLY, G. PAUTOU, AND J. BOUVET. 1991. Universal primers for amplification  
902 of three non-coding regions of chloroplast DNA. *Plant Molecular Biology* 17: 1105–1109.
- 903 TANK, D., AND R. OLMSTEAD. 2008. From annuals to perennials: phylogeny of subtribe  
904 Castillejinae (Orobanchaceae). *American Journal of Botany* 95: 608–625.
- 905 TĚŠITEL, J., P. ŘÍHA, Š. SVOBODOVÁ, T. MALINOVÁ, AND M. ŠTECH. 2010. Phylogeny, Life  
906 History Evolution and Biogeography of the Rhinanthoid Orobanchaceae. *Folia Geobotanica*  
907 45: 347–367.
- 908 TIFFNEY, B., AND S. MANCHESTER. 2001. The use of geological and paleontological evidence in  
909 evaluating plant phylogeographic hypotheses in the Northern Hemisphere Tertiary.  
910 *International Journal of Plant Sciences* 162: 3–17.
- 911 TIFFNEY, B.H. 1985. Perspectives on the Origin of the Floristic Similarity Between Eastern Asia  
912 and Eastern North-America. *Journal of the Arnold Arboretum* 66: 73–94.

- 913 TIFFNEY, B.H. 2008. Phylogeography, Fossils, and Northern Hemisphere Biogeography: The  
914 Role of Physiological Uniformitarianism 1. *Annals of the Missouri Botanical Garden* 95:  
915 135–143.
- 916 TRIPP, E.A., AND L.A. MCDADE. 2014. A Rich Fossil Record Yields Calibrated Phylogeny for  
917 Acanthaceae (Lamiales) and Evidence for Marked Biases in Timing and Directionality of  
918 Intercontinental Disjunctions. *Systematic Biology* 63:660–684:.
- 919 WIENS, J.J., AND M.J. DONOGHUE. 2004. Historical biogeography, ecology and species richness.  
920 *Trends in Ecology & Evolution* 19: 639–644.
- 921 WOLFE, A., C. RANDLE, L. LIU, AND K. STEINER. 2005. Phylogeny and biogeography of  
922 Orobanchaceae. *Folia Geobotanica* 40: 115–134.
- 923 WOODBURN, M.O., T.H. RICH, AND M.S. SPRINGER. 2003. The evolution of tribospheny and the  
924 antiquity of mammalian clades. *Molecular phylogenetics and evolution* 28: 360–385.
- 925 YANG, Z. 2006. Computational Molecular Evolution. Oxford University Press.
- 926 YULE, G.U. 1924. A Mathematical Theory of Evolution, Based on the Conclusions of Dr. J. C.  
927 Willis, F.R.S. *Philosophical Transactions of the Royal Society B: Biological Sciences* 213:  
928 21–87.
- 929 ZAGWIN, W.H. 1960. Aspects of the Pliocene and early Pleistocene vegetation and climate in the  
930 Netherlands. *Mededelingen Geologische Strichting* 3: 1–78.
- 931 ZAGWIN, W.H. 1974. The Pliocene-Pleistocene boundary in western and southern Europe.  
932 *Boreas* 3: 75–97.
- 933 ZANNE, A.E., D.C. TANK, W.K. CORNWELL, J.M. EASTMAN, S.A. SMITH, R.G. FITZJOHN, D.J.  
934 MCGLINN, ET AL. 2014. Three keys to the radiation of angiosperms into freezing  
935 environments. *Nature* 506: 89–92.
- 936
- 937
- 938

Table 1. Taxa and voucher information for plant material from which DNA was extracted. s.n = *sine numero* (without a collecting number). Herbarium abbreviations are as follow: FHO = University of Oxford Herbarium , K = Royal Botanic Gardens Kew , ID, University of Idaho = Stillinger Herbarium , ANDES = Museo de Historia Natural Universidad de los Andes , WTU = University of Washington Herbarium , GH = Harvard University Herbarium , LJU = University of Ljubljana Herbarium , USFS = United States Forest Service , CBFS = University of South Bohemia České Budějovice. GenBank accessions for sequences not generated in this study are also shown.

| Species                                                            | DNA Voucher/Herbarium       | GenBank Accession Number |          |           |           |          |
|--------------------------------------------------------------------|-----------------------------|--------------------------|----------|-----------|-----------|----------|
|                                                                    |                             | ITS                      | ETS      | trnT-trnL | trnL-trnF | rps16    |
| <i>Bartsia alpina</i> L.                                           | Lampinen s.n/ID             | FJ790046                 | KM408206 | KM408239  | KM434119  | N/A      |
| <i>B. crenoloba</i> Wedd.                                          | Solomon 7152/K              | KM408228                 | KM408185 | KM408240  | KM434106  | KM408308 |
| <i>B. laniflora</i> Benth.                                         | SU-24/ANDES                 | KM408221                 | KM408174 | KM408242  | KM434110  | KM408307 |
| <i>B. laticrenata</i> Benth.                                       | Ramsay & Merrow-Smith 771/K | KM408219                 | KM408178 | KM408243  | KM434104  | N/A      |
| <i>B. melampyroides</i> (Kunth) Benth.                             | Tank 2005-07/WTU            | KM408218                 | KM408186 | KM408245  | KM434114  | KM408300 |
| <i>B. orthocarpiflora</i> Benth.                                   | Ollgaard 34129/K            | KM408216                 | KM408184 | KM408246  | KM434111  | KM408296 |
| <i>B. pedicularoides</i> Benth.                                    | Jorgenson 1729/K            | FJ790047                 | N/A      | FJ790077  | N/A       | N/A      |
| <i>B. pyricarpa</i> Molau                                          | Tank 2005-36/WTU            | KM408226                 | KM408182 | KM408247  | KM434102  | KM408294 |
| <i>B. ramosa</i> Molau                                             | CG-016/ANDES                | KM408229                 | KM408176 | KM408248  | KM434108  | KM408304 |
| <i>B. santolinifolia</i> (Kunth) Benth.                            | SU-18/ANDES                 | KM408220                 | KM408175 | KM408249  | KM434109  | KM408306 |
| <i>B. sericea</i> Molau                                            | Tank 2005-06/WTU            | KM408224                 | KM408181 | KM408250  | KM434105  | KM408297 |
| <i>B. cf sericea</i> Molau                                         | Tank 2005-25/WTU            | KM408227                 | KM408179 | KM408251  | KM434101  | KM408302 |
| <i>B. cf inaequalis</i> Benth. <i>ssp. duripilis</i> (Edwin) Molau | Tank 2005-29/WTU            | KM408225                 | KM408183 | KM408252  | KM434107  | KM408295 |
| <i>B. stricta</i> (Kunth) Benth.                                   | SU-1b/ANDES                 | KM408222                 | KM408177 | KM408253  | KM434112  | KM408305 |
| <i>B. tenuis</i> Molau                                             | Tank 2005-02/WTU            | KM408223                 | KM408180 | KM408254  | KM434103  | KM408299 |
| <i>B. thiantha</i> Diels                                           | RGO 2009-23/WTU             | KM408217                 | KM408187 | KM408255  | KM434113  | KM408303 |

|                                                                                      |                            |          |          |          |          |          |
|--------------------------------------------------------------------------------------|----------------------------|----------|----------|----------|----------|----------|
| <i>Bellardia trixago</i> (L.) All.                                                   | Bennett s.n/FHO            | FJ790063 | KM408189 | KM408256 | KM434100 | KM408301 |
| <i>B. viscosa</i> (L.) Fisch. & C.A. Mey                                             | Halse 2249/ID              | AY911244 | KM408188 | KM408273 | KM434095 | KM408298 |
| <i>Bornmuellerantha aucheri</i> (Boiss.) Rothm.                                      | Oganesian et al. 03-1575/K | KM408237 | KM408197 | KM408267 | KM434116 | KM408279 |
| <i>Euphrasia alsa</i> F.Muell.                                                       | Zich 220/GH                | KM408212 | KM408202 | KM408257 | KM434084 | KM408282 |
| <i>E. collina</i> R.Br.                                                              | Zich 209/GH                | N/A      | KM408203 | KM408258 | KM434086 | KM408284 |
| <i>E. mollis</i> (Ledeb.) Wettst.                                                    | Mancuso 107/ID             | KM408213 | N/A      | KM408259 | KM434082 | KM408281 |
| <i>E. regelii</i> Wettst.                                                            | Ho 1741/GH                 | KM408214 | N/A      | KM408260 | KM434085 | KM408285 |
| <i>E. stricta</i> D. Wolff ex J.F. Lehm                                              | Musselman 4872/ID          | KM408215 | N/A      | KM408261 | KM434098 | KM408283 |
| <i>Hedbergia abyssinica</i> (Benth.) Molau var. <i>abyssinica</i>                    | Etuge 3488/K               | FJ790061 | KM408194 | KM408262 | KM434120 | KM408291 |
| <i>H. abyssinica</i> (Benth.) Molau var. <i>nykiensis</i>                            | Carter et al 2386/K        | KM408231 | KM408193 | KM408263 | KM434122 | N/A      |
| <i>H. abyssinica</i> (Benth.) Molau var. <i>petitiana</i>                            | Paton s.n/K                | KM408230 | KM408195 | KM408264 | KM434123 | KM408290 |
| <i>H. decurva</i> (Hochst. ex Benth.) A. Fleischm. & Heubl                           | Wesche 9/K                 | N/A      | KM408191 | KM408241 | KM434121 | KM408292 |
| <i>H. longiflora</i> ssp. <i>longiflora</i> (Hochst. ex Benth.) A. Fleischm. & Heubl | Kisalye van Heist 109/K    | KM408232 | KM408192 | KM408244 | KM434099 | KM408286 |
| <i>Lathraea squamaria</i> L.                                                         | Frajman s.n/LJU            | FJ790044 | KM408204 | EU264174 | KM434087 | KM408309 |
| <i>Melampyrum carstiense</i> Fritsch                                                 | Krajsek s.n/LJU            | GU445314 | N/A      | EU264177 | KM434088 | KM408315 |
| <i>M. lineare</i> Lam.                                                               | Bjork 6465/ID              | KM408208 | KM408207 | KM408265 | KM434096 | KM408316 |
| <i>M. sylvaticum</i> L.                                                              | Krajsek s.n/LJU            | EU624134 | N/A      | KM408266 | KM434089 | KM408314 |
| <i>Odontites corsicus</i> (Loisel.) G. Don                                           | J. Stefani/ID              | KM408238 | KM408200 | KM408268 | KM434117 | N/A      |
| <i>O. linkii</i> Heldr. & Sart. ex Boiss. ssp. <i>cyprius</i>                        | Ferguson 4537/K            | KM408234 | KM408196 | KM408269 | KM434083 | KM408288 |
| <i>O. maroccanus</i> Bolliger                                                        | Gattefose s.n/K            | KM408233 | KM408198 | KM408270 | KM434097 | N/A      |
| <i>O. vulcanicus</i> Bolliger                                                        | Bolliger & Moser O-M3/K    | KM408235 | KM408199 | KM408271 | KM434115 | KM408289 |
| <i>O. vulgaris</i> Moench                                                            | Kharkevich s.n/K           | KM408236 | KM408201 | KM408272 | KM434118 | KM408287 |
| <i>Rhinanthus crista-galli</i> L.                                                    | Bjork 6656/ID              | KM408210 | N/A      | KM408274 | KM434091 | KM408313 |
| <i>R. freynii</i> (A.Kern. ex Sterneck) Fiori                                        | Mathews 04-05              | GU445319 | KM408205 | KM408275 | KM434092 | KM408310 |
| <i>R. kyrollae</i> Chabert                                                           | Stickney 1236/USFS         | KM408209 | N/A      | KM408276 | KM434090 | KM408312 |
| <i>R. serotinus</i> (Schönh.) Oborny                                                 | Musselman 4871/ID          | KM408211 | N/A      | KM408277 | KM434093 | KM408311 |
| <i>Rhynchocorys elephas</i> Griseb.                                                  | Tesitel 5044/CBFS          | FJ790055 | N/A      | FJ790085 | N/A      | N/A      |
| <i>R. kurdica</i> Nábělek                                                            | Tesitel 5042/CBFS          | FJ790037 | N/A      | FJ790067 | N/A      | N/A      |
| <i>R. maxima</i> Richter                                                             | Tesitel 5040/CBFS          | FJ790037 | N/A      | FJ790067 | N/A      | N/A      |
| <i>R. odontophylla</i> R.B.Burbidge & I.Richardson                                   | Tesitel 5038/CBFS          | FJ790034 | N/A      | FJ790064 | N/A      | N/A      |
| <i>R. orientalis</i> Benth.                                                          | Tesitel 5039/CBFS          | FJ790035 | N/A      | FJ790065 | N/A      | N/A      |



|                         |                    |          |          |          |          |          |
|-------------------------|--------------------|----------|----------|----------|----------|----------|
| <i>R. stricta</i> Albov | Tesitel 5047/ CBFS | FJ790057 | N/A      | FJ790087 | N/A      | N/A      |
| <i>Tozzia alpina</i> L. | Mathews 04-04      | AY911258 | KM408190 | KM408278 | KM434094 | KM408280 |

---

1 Table 2. Results for the Approximately Unbiased (AU) and the Shimodaira–Hasegawa (SH) tests  
 2 at  $p < 0.05$  for different constrained relationships. Log likelihood scores for the original analysis  
 3 are given, as well as the difference in log likelihood between the original and the constraint  
 4 topology ( $\hat{\delta}$ ). Values in bold are significant with 95% confidence.

5

| nrDNA analysis constraint compared to clades from the    | ln likelihood | $\hat{\delta}$ | AU            | SH           |
|----------------------------------------------------------|---------------|----------------|---------------|--------------|
| cpDNA analysis                                           |               |                |               |              |
| Unconstrained nrDNA analysis                             | -8445.56      |                |               |              |
| <i>Tozzia + Hedbergia</i>                                | -8449.04      | 3.48           | 0.166         | 0.186        |
| <i>H. decurva + H. abyssinica</i> var. <i>nykiensis</i>  | -8464.51      | 18.95          | <b>0.004</b>  | <b>0.026</b> |
| <i>Odontites + Bellardia</i>                             | -8456.43      | 10.87          | 0.141         | 0.131        |
| cpDNA analysis constraint compared to clades from        |               |                |               |              |
| the nrDNA analysis                                       |               |                |               |              |
| Unconstrained cpDNA analysis                             | -10044.47     |                |               |              |
| <i>Tozzia + Bellardia</i>                                | -10064.45     | 19.98          | <b>0.001</b>  | <b>0.017</b> |
| <i>H. decurva + H. longiflora</i> ssp. <i>longiflora</i> | -10053.20     | 8.73           | 0.07          | 0.101        |
| <i>Odontites + Euphrasia</i>                             | -10071.61     | 27.14          | <b>0.0004</b> | <b>0.008</b> |

6

7

8

9

10

11

12

13 Table 3. Divergence time estimates for the main clades, with each node representing the most  
14 recent common ancestor (mrca) of the taxa mentioned. The first value was obtained by  
15 calibrating the node of divergence of *Melampyrum* from its sister clade. The calibration point  
16 had a prior with lognormal distribution, offset 25 Myr, mean of 0.9, and standard deviation of  
17 0.8, using the results of Wolfe et al. (2005), but incorporating considerable temporal uncertainty.  
18 The second value corresponds to an additional analysis where the uplift of the Andes was used as  
19 the calibration point of the node of divergence for S. Am. *Bellardia*. This last calibration had a  
20 prior with a lognormal distribution, offset of 1.7 Myr, mean of 0.2, and standard deviation of 0.6.  
21 Median age estimates as well as the 95% highest posterior density (HPD) are shown for both  
22 analyses. In addition, the composite Akaike weights ( $w_i$ ) from our biogeographic analyses are  
23 shown for the ‘expert based’ coding of current geographic distributions with the following  
24 abbreviations: A (Africa), EU (Europe), EUR (Eurasia), ENA (Eastern North America), SAM  
25 (South America). Evidence ratio is presented for the most supported geographic reconstruction.

26

27

28

29

30

31

32

33

34

| Node (mrca)                               | Median Age (Ma) | 95% HPD (Ma)              | $w_i$                                     | Evidence Ratio    | 35 |
|-------------------------------------------|-----------------|---------------------------|-------------------------------------------|-------------------|----|
| Root                                      | 30.65 / 30.98   | 25.55–38.83 / 29.13–35.96 | EU 0.31                                   | 1.82              | 36 |
| <i>Melampyrum</i>                         | 14.70 / 15.02   | 7.41–24.89 / 7.14–24.32   | EU 0.18                                   | 1.8               |    |
| <i>Lathraea–Bellardia</i>                 | 27.01 / 27.38   | 25.19–31.64 / 20.87–33.57 | EU 0.53                                   | 3.8               | 37 |
| <i>Rhynchosorys–Lathraea</i>              | 20.53 / 20.33   | 15.18–26.27 / 13.97–26.88 | EU 0.58                                   | 2.4               | 38 |
| <i>Rhinanthus–Lathraea</i>                | 16.66 / 16.49   | 10.78–22.64 / 10.37–23.14 | EU 0.53                                   | 2.2               |    |
| <i>Rhynchosorys</i>                       | 11.65 / 11.57   | 7.13–17.43 / 6.69–17.45   | EU 0.49                                   | 2.13              | 39 |
| <i>Bartsia alpina–Bellardia</i>           | 22.62 / 22.33   | 17.49–28.07 / 16.23–28.36 | EU 0.44                                   | 1.69              | 40 |
| <i>Euphrasia–Bellardia</i>                | 19.25 / 19.02   | 14.35–24.23 / 13.72–24.60 | EU+EUR 0.43                               | 1.95              |    |
| <i>Euphrasia</i>                          | 6.66 / 6.57     | 3.53–10.31 / 3.60–10.38   | EUR 1.0                                   | –                 | 41 |
| <i>Tozzia–Bellardia</i>                   | 16.62 / 16.42   | 12.23–21.75 / 11.61–21.48 | EU 0.53                                   | 1.76              | 42 |
| <i>Tozzia–Hedbergia</i>                   | 13.64 / 13.51   | 8.78–18.70 / 8.69–18.75   | A+EU 0.94                                 | 23.5              |    |
| <i>H. longiflora–H. decurva</i>           | 6.94 / 6.90     | 3.67–10.93 / 3.60–10.96   | A 0.99                                    | 247.5             | 43 |
| <i>Odontites–Bellardia</i>                | 14.61 / 14.39   | 10.13–19.26 / 9.93–19.19  | EU 0.80                                   | 8.88              |    |
| <i>Odontites</i>                          | 9.38 / 9.29     | 6.22–13.02 / 5.94–13.29   | EU 1.0                                    | –                 | 44 |
| <i>Bellardia trixago–Neobartsia</i> clade | 8.73 / 8.48     | 5.12–12.76 / 4.95–12.48   | EU+SAM 0.26<br>EU 0.18<br>EU+EUR+SAM 0.16 | 1.44<br>1.13<br>– | 45 |
| <i>Bellardia viscosa–Neobartsia</i> clade | 7.39 / 7.16     | 4.21–11.24 / 4.03–10.84   | EU+SAM 0.53<br>EU+EUR+SAM 0.35            | 1.51<br>11.66     | 46 |
| <i>Neobartsia</i> clade                   | 2.59 / 2.63     | 1.51–4.08 / 1.97–3.58     | SAM 1.0                                   | –                 | 47 |

48

49

50

51

52

53

54

55

56

57 Table 4. The composite Akaike weights ( $w_i$ ) are shown for our three different coding scenarios:  
 58 conservative, expert based, and species specific. Abbreviations are as follow: A (Africa), EU  
 59 (Europe), EUR (Eurasia), ENA (Eastern North America), SAM (South America). Evidence ratio  
 60 is presented for the most supported geographic reconstruction.  
 61

| Coding Scheme                         | <i>Conservative</i> |                | <i>Expert based</i> |                | <i>Species specific</i> |                |
|---------------------------------------|---------------------|----------------|---------------------|----------------|-------------------------|----------------|
| Node (mrca)                           | $w_i$               | Evidence Ratio | $w_i$               | Evidence Ratio | $w_i$                   | Evidence Ratio |
| Root                                  | EU 0.52             | 3.71           | EU 0.31             | 1.82           | EU+ENA 0.40             | 1.05           |
| <i>Melampyrum</i>                     | EU 0.25             | 3.57           | EU 0.18             | 1.8            | EU+ENA 0.93             | 4.65           |
| <i>Lathraea–Bellardia</i>             | EU 0.81             | 11.6           | EU 0.53             | 3.8            | EU 0.76                 | 8.4            |
| <i>Rhynchosorys–Lathraea</i>          | EU 0.73             | 8.11           | EU 0.58             | 2.4            | EU 0.92                 | 13.14          |
| <i>Rhinanthus–Lathraea</i>            | EU 0.67             | 6.1            | EU 0.53             | 2.2            | EU 0.96                 | 13.7           |
| <i>Rhynchosorys</i>                   | EU 0.62             | 5.16           | EU 0.49             | 2.13           | EU 0.70                 | 2.59           |
| <i>Bartsia alpina–Bellardia</i>       | EU 0.84             | 16.8           | EU 0.44             | 1.69           | EU 0.59                 | 3.10           |
| <i>Euphrasia–Bellardia</i>            | EU 0.80             | 26.6           | EU+EUR 0.43         | 1.95           | EU+EUR 0.40             | 1.81           |
| <i>Euphrasia</i>                      | EU 0.26             | 2.88           | EUR 1.0             | –              | EUR 1.0                 | –              |
| <i>Tozzia–Bellardia</i>               | EU 0.74             | 5.28           | EU 0.53             | 1.76           | EU 0.53                 | 1.96           |
| <i>Tozzia–Hedbergia</i>               | A+EU 0.90           | 11.25          | A+EU 0.94           | 23.5           | A+EU 0.91               | 15.16          |
| <i>Hedbergia</i>                      | A 0.98              | 122.5          | A 0.99              | 247.5          | A 0.98                  | 81.66          |
| <i>Odontites–Bellardia</i>            | EU 0.79             | 26.03          | EU 0.80             | 8.88           | EU 0.76                 | 7.6            |
| <i>Odontites</i>                      | EU 0.74             | 6.16           | EU 1.0              | –              | EU 0.93                 | 15.5           |
| <i>B. trixago–Neobartsia</i><br>clade | EU+SAM 0.21         | 1.31           | EU+SAM 0.26         | 1.44           | EU+SAM 0.24             | 1.33           |
|                                       | EU 0.16             | 1.45           | EU 0.18             | 1.13           | EU 0.18                 | 1.06           |
|                                       | EU+EUR+SAM<br>0.11  | –              | EU+EUR+SAM<br>0.16  | –              | EU+EUR+SAM<br>0.17      | –              |
| <i>B. viscosa–Neobartsia</i><br>clade | EU+SAM 0.48         | 1.77           | EU+SAM 0.53         | 1.51           | EU+SAM 0.49             | 1.29           |
|                                       | EU+EUR+SAM<br>0.27  | 6.75           | EU+EUR+SAM<br>0.35  | 11.66          | EU+EUR+SAM<br>0.38      | 12.66          |
| <i>Neobartsia</i> clade               | SAM 1.0             | –              | SAM 1.0             | –              | SAM 1.0                 | –              |

76  
 77  
 78  
 79

80 Table 5. Results from our diversification rate analyses using MEDUSA and SymmeTREE over a  
 81 posterior distribution of trees. The shifts were found at the nodes subtending the taxa specified in  
 82 the first column, followed by the frequency of that shift in the posterior distribution of trees, the  
 83 net diversification rate ( $r$ ) for the maximum clade credibility tree (mcc), and the mean, median,  
 84 minimum (min), maximum (max), and standard deviation (sd) summarized across 1,000 trees  
 85 from the posterior distribution. In the results for SymmeTREE, two different significance values  
 86 ( $\alpha$ ) were examined,  $\alpha < 0.05$ , and  $\alpha < 0.10$ .

87

88

| <b>Node</b>                           | <b>Freq. shift</b> | <b><math>r</math><br/>mcc</b> | <b><math>r</math><br/>mean</b> | <b><math>r</math><br/>median</b> | <b><math>r</math><br/>min.</b> | <b><math>r</math><br/>max.</b> | <b><math>r</math><br/>sd</b> |
|---------------------------------------|--------------------|-------------------------------|--------------------------------|----------------------------------|--------------------------------|--------------------------------|------------------------------|
| <b>MEDUSA</b>                         |                    |                               |                                |                                  |                                |                                |                              |
| <i>Bartsia alpina</i>                 | 1.17               | 0                             | -0.04                          | -0.15                            | -0.32                          | 0.33                           | 0.18                         |
| <i>Tozzia-Hedbergia</i>               | 0.75               | 0.05                          | -0.06                          | 0.00                             | -0.36                          | 0.73                           | 0.14                         |
| <i>Neobartsia</i> clade               | 0.40               | 0.79                          | 0.40                           | 0.38                             | 0.15                           | 1.03                           | 0.13                         |
| Clade sister to <i>Bartsia alpina</i> | 0.32               | n/a                           | 0.09                           | 0.12                             | -0.18                          | 0.26                           | 0.07                         |
| <i>Rhinanthus-Lathraea</i>            | 0.12               | n/a                           | 0.17                           | 0.16                             | 0.12                           | 0.28                           | 0.03                         |
| <i>Core Rhinanthaeae</i>              | 0.07               | n/a                           | 0.11                           | 0.12                             | -0.11                          | 0.47                           | 0.07                         |

| <b>SymmeTREE</b>        | <b>Freq. shift at <math>p &lt; 0.05</math></b> | <b>Freq. shift <math>p &lt; 0.10</math></b> |
|-------------------------|------------------------------------------------|---------------------------------------------|
| <i>Bartsia alpina</i>   | 1.00                                           | 1.00                                        |
| <i>Tozzia-Hedbergia</i> | 0.00                                           | 0.93                                        |
| <i>Neobartsia</i> clade | 0.14                                           | 0.48                                        |

89

90

91

92

93

94

95

96 **Figure 1**

97 Majority rule consensus tree (excluding burn-in trees) with mean branch lengths from the  
98 partitioned Bayesian analysis of the combined dataset. Branch lengths are proportional to the  
99 number of substitutions per site as measured by the scale bar. Values above the branches  
100 represent Bayesian posterior probabilities (PP) and maximum likelihood bootstrap support (BS).  
101 Major clades are summarized following species names with the current species diversity in  
102 parenthesis.

103

104 **Figure 2**

105 Majority rule consensus tree (excluding burn-in trees) with mean branch lengths from the  
106 partitioned Bayesian analysis of the a) nuclear ribosomal (nr) DNA and b) the chloroplast (cp)  
107 DNA datasets. Branch lengths are proportional to the number of substitutions per site as  
108 measured by the scale bar. Values above the branches represent Bayesian posterior probabilities  
109 (PP) and maximum likelihood bootstrap support (BS).

110

111 **Figure 3**

112 Topology obtained after combining and annotating five independent BEAST analyses. The  
113 calibration point was set at the node where all genera are included except for *Melampyrum*. The  
114 calibration had a prior with a lognormal distribution, offset 25 Ma, a mean of 0.9, and a standard  
115 deviation of 0.8 following dates by Wolfe et al. (2005). Time in millions of years ago (Ma) is  
116 represented by the scale below the tree. Current distributions of the species are color-coded after  
117 the species names. The current distributions are plotted on a map below the species names and  
118 correspond to blue for Eurasia, red for Europe, yellow for Africa, black for northeastern North

119 America, and green for South America. The most supported ancestral range reconstructions  
120 obtained from a Lagrange analysis, are plotted on the tree with color rectangles or circles with  
121 numbers that represent different biogeographic hypotheses. Ancestral range reconstruction  
122 scenarios are plotted on five different maps on the left of the figure, each with a number that  
123 distinguishes it. Composite Akaike weights ( $w_i$ ) are plotted in the form of histograms for nodes  
124 where the reconstruction had competing hypotheses. Two possible routes of migration, one  
125 including the North Atlantic Land Bridge (NALB) and one including the Bering Strait, are  
126 shown on maps 5 and 6.

127

128

129

130

131

132

133

134

135

136

137

138

139

140

141



142 Figure 1

143

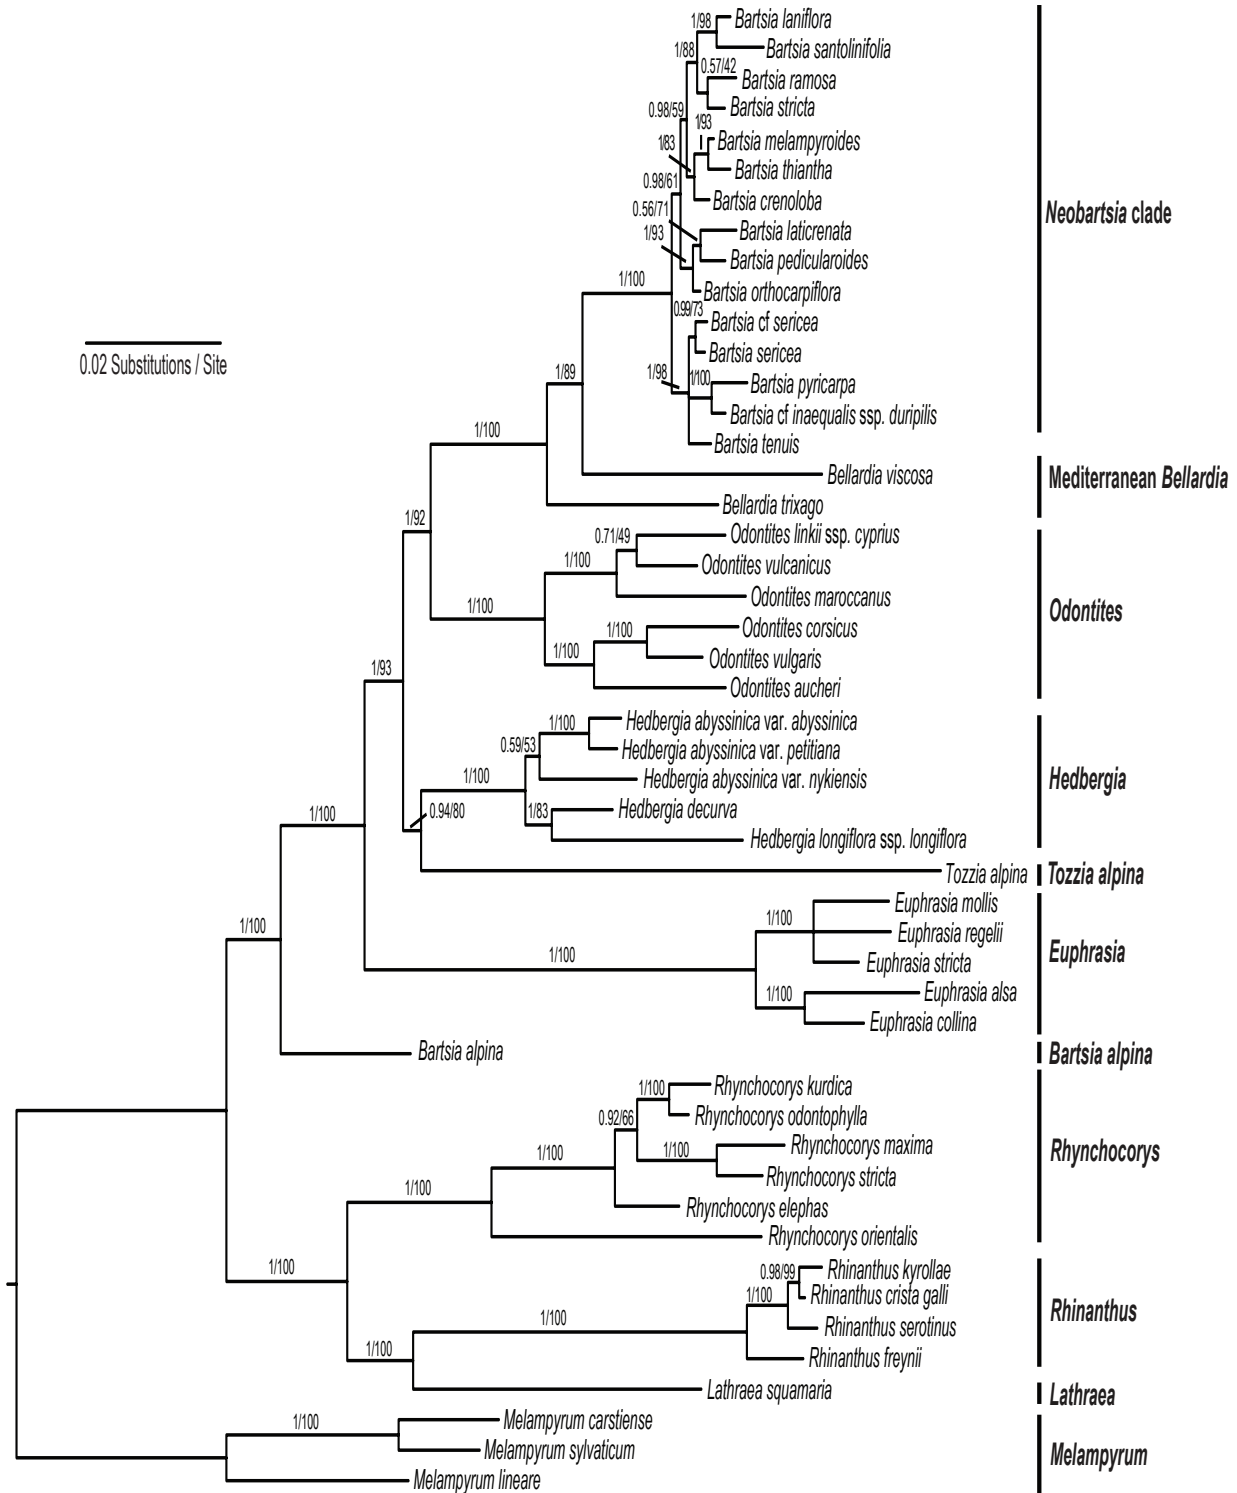

144

145 Figure 2

146

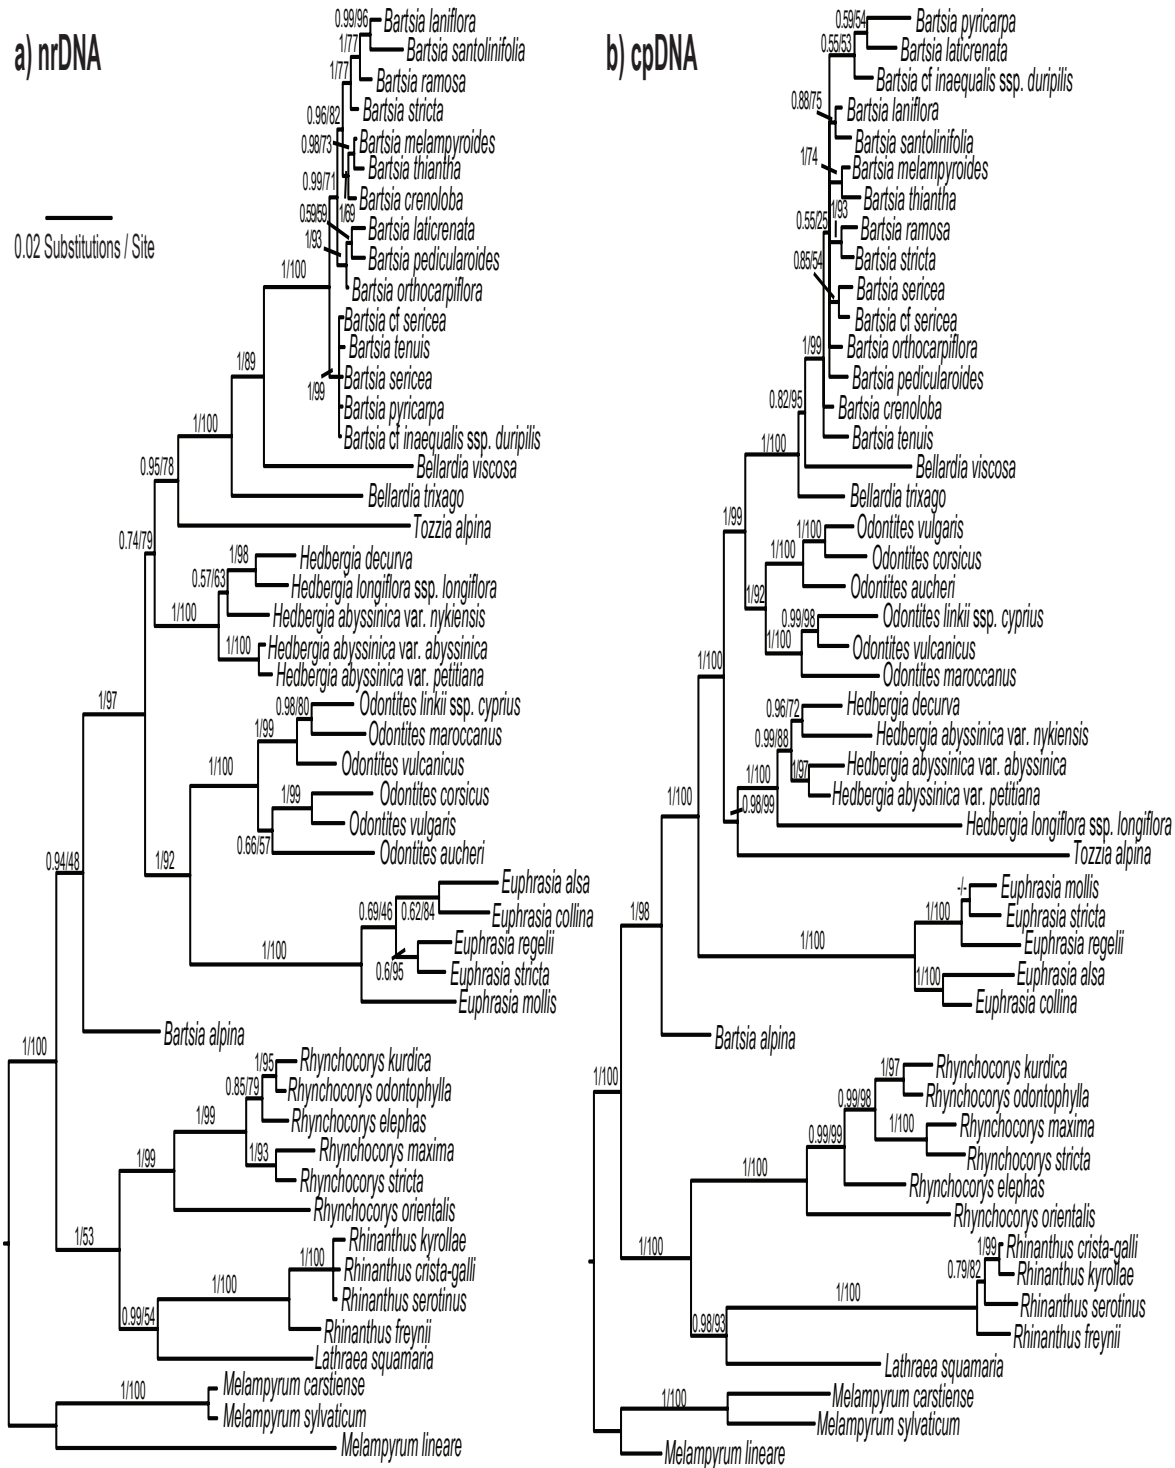

147

148 Figure 3

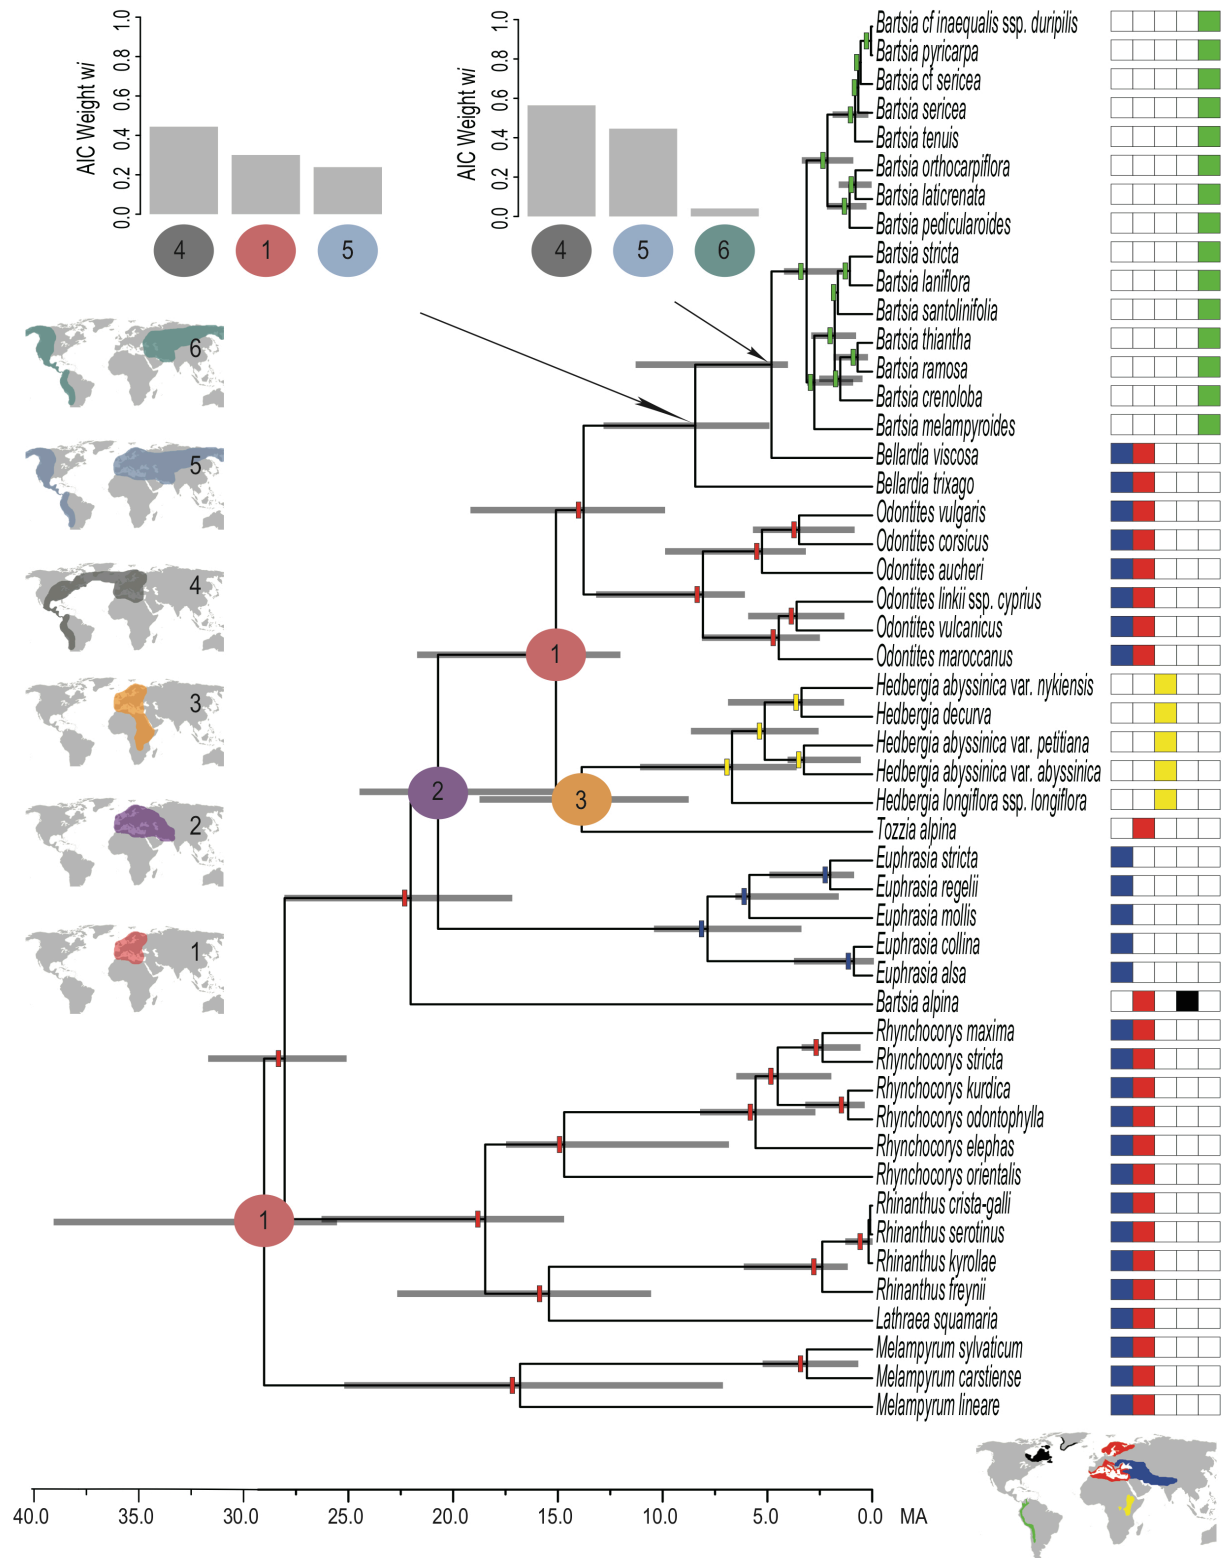

Source: https://www.biorxiv.org/content/10.1101/019554v1.full.pdf
